# Cbln1 directs axon targeting by corticospinal neurons specifically toward thoraco-lumbar spinal cord

Janet H.T. Song<sup>a</sup>, Carolin Ruven<sup>b</sup>, Payal Patel<sup>b</sup>, Frances Ding<sup>a</sup>, Jeffrey D. Macklis<sup>a,\*</sup>, Vibhu Sahni<sup>a,b,\*</sup>

<sup>a</sup>Department of Stem Cell and Regenerative Biology, and Center for Brain Science, Harvard University, Cambridge, Massachusetts 02138, USA

<sup>b</sup>Burke Neurological Institute, White Plains, New York 10605, USA; Feil Family Brain and Mind Research Institute, Weill Cornell Medicine, New York, New York 10065, USA

## Abstract

Corticospinal neurons (CSN) are centrally required for skilled voluntary movement, which necessitates that they establish precise subcerebral connectivity with the brainstem and spinal cord. However, molecular controls regulating specificity of this projection targeting remain largely unknown. We previously identified that developing CSN subpopulations exhibit striking axon targeting specificity in the spinal white matter. These CSN subpopulations with segmentally distinct spinal projections are also molecularly distinct; a subset of differentially expressed genes between these distinct CSN subpopulations function as molecular controls regulating differential axon projection targeting. Rostrolateral CSN extend axons exclusively to bulbar-cervical segments (CSN<sub>BC-lat</sub>), while caudomedial CSN (CSN<sub>medial</sub>) are more heterogeneous, with distinct, intermingled subpopulations extending axons to either bulbar-cervical or thoraco-lumbar segments. Here, we report that *Cerebellin 1* (*Cbln1*) is expressed specifically by CSN in medial, but not lateral, sensorimotor cortex. *Cbln1* shows highly dynamic temporal expression, with *Cbln1* levels in CSN highest during the period of peak axon extension toward thoraco-lumbar segments. Using gain-of-function experiments, we identify that Cbln1 is sufficient to direct thoraco-lumbar axon extension by CSN. Mis-expression of Cbln1 in CSN<sub>BC-lat</sub> either by *in utero* electroporation, or in postmitotic CSN<sub>BC-lat</sub> by AAV-mediated gene delivery, re-directs these axons past their normal bulbar-cervical targets toward thoracic segments. Further, Cbln1 overexpression in postmitotic CSN<sub>medial</sub> increases the number of CSN<sub>medial</sub> axons that extend past cervical segments into the thoracic cord. Collectively, these results identify that Cbln1 functions as a potent molecular control over thoraco-lumbar CSN axon extension, part of an integrated network of controls over segmentally-specific CSN axon projection targeting.

## Significance Statement

Corticospinal neurons (CSN) exhibit remarkable diversity and precision of axonal projections to targets in the brainstem and distinct spinal segments; the molecular basis for this targeting diversity is largely unknown. CSN subpopulations projecting to distinct targets are also molecularly distinguishable. Distinct subpopulations degenerate in specific motor neuron diseases, further suggesting that intrinsic molecular differences might underlie differential vulnerability to disease. Here, we identify a novel molecular control, Cbln1, expressed by CSN extending axons to thoraco-lumbar spinal segments. Cbln1 is sufficient, but not required, for CSN axon extension toward distal spinal segments, and *Cbln1* expression is controlled by recently identified, CSN-intrinsic regulators of axon extension. Our results identify that Cbln1, together with other regulators, coordinates segmentally precise CSN axon targeting.

## Introduction

For skilled motor control, the cerebral cortex must precisely and accurately connect with specific spinal segments (Sahni

et al., 2020). How corticospinal neuron (CSN) axonal projection targeting is established during development underlies motor function, CNS organization, and species differences in orofacial and forelimb dexterity during evolution. Prior work in the field has identified molecular controls over CSN specification, development, and projection targeting (Arlotta et al., 2005; Molyneaux et al., 2005; Chen et al., 2005; Pang et al., 2000b; Lai et al., 2008; Chen et al., 2008; Kwan et al., 2008; Joshi et al., 2008; Tomassy et al., 2010; McKenna et al., 2011; Han et al., 2011; Shim et al., 2012; Lodato et al., 2014; Muralidharan et al., 2017; Diaz et al., 2020; Sahni et al., 2021a,b).

We recently identified that developing CSN subpopulations exhibit striking axon targeting specificity in the spinal white matter, and that this establishes the foundation for durable specificity of adult corticospinal circuitry. CSN<sub>BC-lat</sub>, which reside in rostro-lateral cortex, are relatively homogeneous, with projections to only bulbar-cervical segments. In contrast, CSN residing in medial sensorimotor cortex (CSN<sub>medial</sub>) are more heterogeneous, with distinct interdigitated subpopulations extending axons to either bulbar-cervical or thoraco-lumbar segments—CSN<sub>BC-med</sub> extend axons only to bulbar-cervical segments, while CSN<sub>TL</sub> extend axons past cervical cord to thoracic and lumbar spinal segments. We further identified that these segmentally distinct CSN subpopulations are molecularly

\*Corresponding author

Email addresses: [jeffrey\\_macklis@harvard.edu](mailto:jeffrey_macklis@harvard.edu) (Jeffrey D. Macklis), [vis2763@med.cornell.edu](mailto:vis2763@med.cornell.edu) (Vibhu Sahni)

distinct from early development, enabling molecular delineation and prospective identification even before eventual axon-targeting decisions are evident in the spinal cord: 1) *Klhl14* expression delineates *Klhl14*-positive CSN<sub>BC-lat</sub> from *Klhl14*-negative CSN<sub>BC-med</sub>; 2) all CSN<sub>TL</sub> are *Klhl14*-negative; and 3) nearly all CSN<sub>TL</sub> express *Crim1* (schematized in Fig. 1A) (Sahni et al., 2021a).

*Crim1* and *Klhl14* direct differential CSN axon segmental targeting by these subpopulations (Sahni et al., 2021b), indicating that the diversity of CSN axonal targeting is controlled in part by CSN-intrinsic mechanisms. *Crim1* is both necessary and sufficient for CSN<sub>TL</sub> axon extension to thoracic and lumbar segments. *Crim1* mis-expression is sufficient to re-direct a subset of CSN<sub>BC-lat</sub> axons into the caudal thoracic cord. However, this effect of *Crim1* mis-expression, though striking, only affects a minority of the overall CSN<sub>BC-lat</sub> subpopulation, with the majority of CSN<sub>BC-lat</sub> axons terminating in the cervical cord. In addition, although a subset of CSN<sub>TL</sub> axons, which normally extend past the cervical cord, fail to extend to caudal thoracolumbar segments in *Crim1* null mice, ~ 50% of CSN<sub>TL</sub> axons still reach the lumbar cord. This indicates that some CSN<sub>TL</sub> axons can extend to distal spinal targets independent of *Crim1* function. Collectively, these results indicate that there are likely additional regulators that direct CSN<sub>TL</sub> axon extension to distal spinal segments.

Here, we identify *Cbln1* as a novel regulator of CSN axon targeting to thoraco-lumbar spinal segments. *Cbln1* is a member of the C1q superfamily, which includes proteins critically essential for normal function of the immune and nervous systems (Ghai et al., 2007; Stevens et al., 2007; Yuzaki, 2011). *Cbln1* has been extensively characterized in the cerebellum, where it is required for synapse formation and synapse stabilization between parallel fibers of granule cells and Purkinje cell dendrites (Hirai et al., 2005; Matsuda et al., 2010; Uemura et al., 2010; Elegheert et al., 2016; Ibata et al., 2019; Takeo et al., 2021). More recently, it also has been shown to play roles in synapse formation in the striatum and the hippocampus (Kusnoor et al., 2010; Seigneur and Südhof, 2018). There is no previously reported function for *Cbln1* in corticospinal connectivity.

We find that *Cbln1* is expressed specifically by CSN<sub>medial</sub>, and its expression coincides with the peak period of CSN axon extension toward thoraco-lumbar spinal segments. Mis-expression of *Cbln1* in CSN<sub>BC-lat</sub> is sufficient to re-direct axons past their normal targets in the cervical cord toward distal thoracic segments. We also identify that *Cbln1* over-expression in CSN<sub>medial</sub> can increase the number of axons extending past the cervical cord toward thoraco-lumbar segments. This suggests that *Cbln1* is sufficient to direct thoraco-lumbar extension by CSN axons in these contexts. Further, this effect on CSN axon extension occurs prior to axon collateralization and synapse formation, establishing a novel function for *Cbln1* in directing axon extension, independent of its known functions in synapse formation established elsewhere in the central nervous system. Together, these results identify *Cbln1* as a novel, CSN-intrinsic determinant of thoraco-lumbar segmental axon targeting specificity.

## Materials and Methods

### Mice

CD-1 mice (Charles River Laboratories, Wilmington, MA) were used for gene expression analysis, *in utero* electroporation, and AAV injections. *Fzf2* null mice were generated previously (Hirata et al., 2004) and have been described (Molyneaux et al., 2005). *Cbln1* null mice were generated and described previously (Hirai et al., 2005). E0.5 was set as the day of the vaginal plug, and P0 was set as the day of birth. Mice received food and water *ad libitum*, and were housed on a 12-hour on/off light cycle. All mouse studies were approved by the IACUC at Harvard University and at Weill Cornell Medicine. All studies were performed in accordance with institutional and federal guidelines.

### Tissue collection and preparation

Mice were anesthetized by hypothermia (P0-P4) or with an intraperitoneal injection (P7-adult) of 0.015 mL/g body weight Avertin (1.25% 2-2-2 tribromoethanol in a solvent that contains 0.63% isoamyl alcohol by weight in ddH<sub>2</sub>O). Mice were perfused transcardially, first with PBS then with 4% paraformaldehyde (PFA) for fixation. The skull, musculature, limbs, and internal organs (viscera) were removed from the thoracic and abdominal cavities. The remaining skeletal structures were post-fixed overnight in 4% PFA at 4°C. The brains were also dissected out, and postfixed overnight in 4% PFA at 4°C. The following day, the spinal cords were dissected out of the vertebral column. The brains and spinal cords were then washed in 1X PBS, and stored in 1X PBS at 4°C.

To collect embryonic tissue (E18.5), timed pregnant females were anesthetized with an intraperitoneal injection of 1 mL Avertin, and euthanized with an additional 1 mL intracardiac injection of Avertin. Embryos were dissected from the uterine horn and decapitated, and the entire head was fixed overnight in 4% PFA at 4°C. The following day, the brains were dissected out, washed in 1X PBS, and stored in 1X PBS at 4°C.

For immunocytochemistry and *in situ* hybridization, brains or spinal cords were placed in Tissue-Tek OCT Compound (Sakura Finetek, Torrance, CA) for sectioning using a cryostat (Leica CM3050 S, Wetzlar, Germany). Prior to sectioning, the cerebellum, pons, and medulla were removed with a razor blade, leaving the forebrain. 50  $\mu$ m coronal brain sections, or 50  $\mu$ m axial or sagittal spinal cord sections, were obtained using a cryostat. All sections were stored in 1X PBS at 4°C.

### *In situ* hybridization and immunocytochemistry

*In situ* hybridization was performed as previously described (Arlotta et al., 2005). The primer sequences used to generate the *in situ* hybridization probes are from the Allen Brain Atlas (<http://www.brain-map.org>). Brains were fixed and stained using standard methods (Molyneaux et al., 2005), with the primary antibody rabbit anti-GFP, 1:500 (Invitrogen).

### *Retrograde labeling of corticospinal neurons*

CNS that project to lumbar spinal segments were retrogradely labeled at P5 with an Alexa Fluor 555-conjugated cholera toxin subunit B (CTB-555) recombinant retrograde tracer (Invitrogen). For these injections, mice were anesthetized under ice for 4 minutes, then visualized by Vevo 770 ultrasound backscatter microscopy (VisualSonics, Toronto, Canada) using Aquasonic 100 ultrasound gel (Parker Laboratories, Fairfield, NJ). 4 slow-pulse injections of 60 nl of CTB-555 (2 mg/ml) were deposited on each side of the midline at L1-L2 using a pulled glass micropipette with a nanojector (Nanoject II, Drummond Scientific, Broomall, PA) to obtain bilateral labeling. The mice were placed on a heating pad for recovery. Mice were euthanized at P7, allowing the retrograde tracers 2 days for transport.

### *Anterograde labeling of corticospinal neurons*

P28 mice were anesthetized using isoflurane anesthesia (2.5% in 100% O<sub>2</sub>), and injected in caudomedial cortex with the anterograde tracer biotinylated dextran amine (BDA) using the following stereotactic coordinates - 1.0 mm lateral to the midline at Bregma at a depth of 0.8 mm. A glass capillary micropipette was filled with a 10% solution of BDA (10,000 MW; Thermo Fisher) which was delivered into the cortex by iontophoresis using constant current conditions (8 microamps; 7 seconds on 7 seconds off) for a total period of 20 minutes. Mice were perfused at P35. The injection site and labeled axons were visualized using DAB staining (Vector Laboratories, Burlingame, CA).

### *In utero electroporation*

Surgeries were performed as previously described (Molyneux et al., 2005; Greig et al., 2016). To generate the *Cbln1* over-expression construct, *Cbln1* cDNA was cloned 3' to an EGFP coding sequence, which was driven by the CAG promoter, and the two ORFs were separated by the t2A linker sequence. In the control plasmid, the *Cbln1* cDNA was replaced with a STOP codon 3' to the t2A linker sequence.

### *AAV-mediated gene delivery*

Constructs expressing GFP or *Cbln1* were packaged into AAV 2/1, a serotype known to be specific to neuronal expression, by the Massachusetts General Hospital Virus Core using established protocols. At P0, the appropriate viral mixture (103.5 ng of AAV, 0.05% DiI, and 0.08% Fast Green in 1X PBS) was injected at 23 nl per injection into specific cortical subregions using the same set-up described previously for *in utero* electroporation (Molyneux et al., 2005; Greig et al., 2016). All viral work was approved by the Harvard Committee on Microbiological Safety, and the Institutional Biosafety Committee at Weill Cornell Medicine; all work was conducted according to institutional guidelines.

### *Imaging and quantification*

For all CST quantification on axial sections, 60X confocal Z stacks of the entire CST in the dorsal funiculus were obtained on either a Biorad Radiance 2100 confocal microscope (Biorad, Hercules, CA), a Zeiss LSM 880 confocal microscope (Zeiss, Oberkochen, Germany), or a Leica SP8 confocal microscope (Leica Microsystems). Cervical, thoracic, and/or lumbar cord axial sections were imaged using identical parameters. 4X and 10X images of brain and spinal cord sections were obtained on either an ANDOR Clara DR328G camera (ANDOR Technology, South Windsor, CT) mounted on a Nikon Eclipse 90i microscope (Nikon Instruments) or a Zeiss Axioimager M2 (Zeiss) using Stereo Investigator software (MBF Biosciences).

For counts of CNS retrogradely labeled from lumbar L1-L2, we first examined the spinal cord to confirm the matched spinal level of the retrograde tracer injection. Following this confirmation, we imaged and analyzed matched coronal sections for each of three specific rostrocaudal levels in wild-type, *Cbln1* heterozygous, and *Cbln1* null mice. *Cbln1* wild-type and *Cbln1* heterozygous mice are indistinguishable in this line (Hirai et al., 2005). The labeled neurons were counted using the cell counter function in ImageJ (National Institutes of Health, Bethesda, MD). In all mice, regardless of the genotype, labeled neurons were only found in the medial cortex upon retrograde injection in L1-L2.

For counts of anterogradely labeled, BDA+ axons in the cervical, thoracic, and lumbar spinal cords, we first examined coronal sections of the brain to confirm matched sites of anterograde tracer injection. We then counted the number of axons present at the cervical C1-C2, thoracic T1-T2, and lumbar L1-L2 levels using the cell counter function in ImageJ.

For EGFP+ axon counts in axial sections, 3 axial sections were imaged at both cervical C1-C2 and thoracic T1-T2 levels per mouse, and the axon counts were averaged from 3 separate sections. For axon intensity measurements in axial sections, at least 3 axial sections were imaged for each mouse at cervical C1-C2, thoracic T1-T2, and lumbar L1-L2. Background fluorescence intensity was measured from the maximum intensity projection of each Z stack image, and subtracted from the Z stack using ImageJ, such that the intensity of parts of the section without labeled axons was zero. The dorsal funiculus was then selected as the region of interest, and the intensity was measured in each Z stack image. The top 3 measurements from the Z stack were averaged as the fluorescence intensity for that section. These measurements were then averaged for at least 3 axial sections at each spinal cord segmental level.

For axon extension experiments, the thoracic cord was sectioned sagittally, and every section that contained a labeled axon was imaged. Each such section was imaged in its entirety, from rostral to caudal and throughout the medio-lateral Z axis. Z stacks for each such section were collapsed to a single two-dimensional plane using the "create focused image" function on the NIS-Elements acquisition software (Nikon Instruments). The collapsed sections were then further combined into one two-dimensional image per mouse by aligning the edges of each section and performing a maximum intensity projection

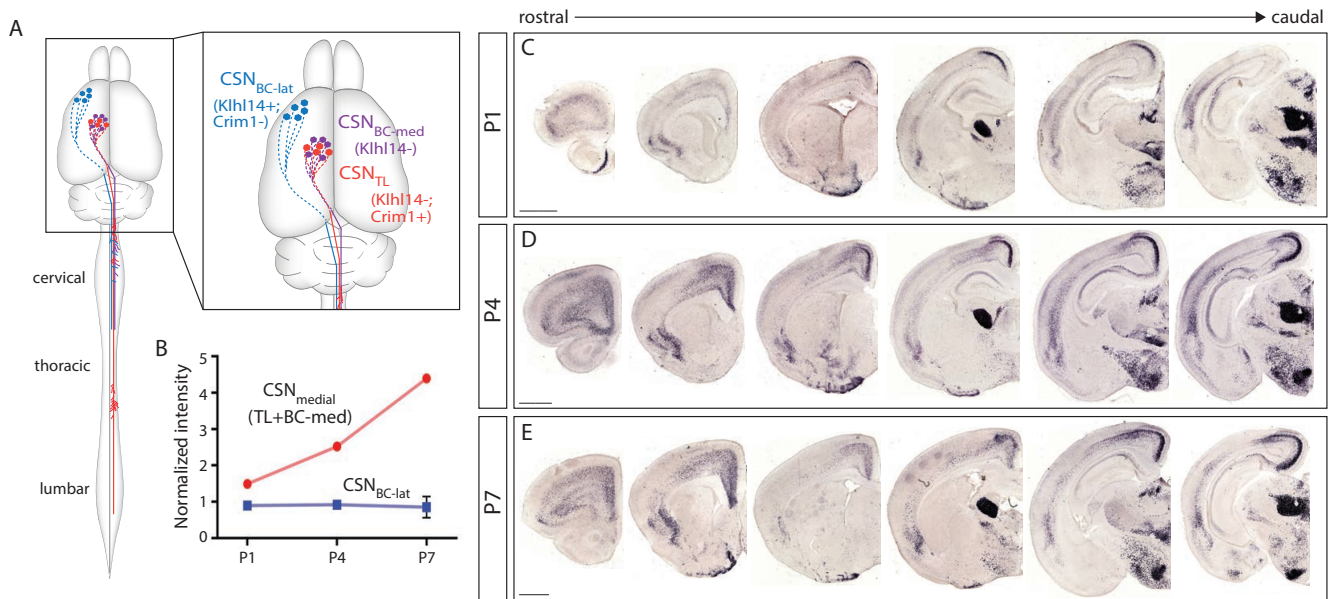

**Figure 1: Cbln1 is specifically expressed by CSN residing in medial sensorimotor cortex.** (A) Schematic of the mouse brain and spinal cord, with inset delineating the three spatially, segmentally, and molecularly distinct CSN subpopulations: CSN<sub>BC-lat</sub> (blue) reside in rostro-lateral sensorimotor cortex and extend axons only to bulbar-cervical segments; CSN<sub>TL</sub> (red) reside in medial sensorimotor cortex and extend axons to thoraco-lumbar spinal segments; and CSN<sub>BC-med</sub> (purple) also reside in medial sensorimotor cortex and extend axons only to bulbar-cervical segments. CSN<sub>TL</sub> and CSN<sub>BC-med</sub> are both located in medial sensorimotor cortex, cannot be spatially distinguished, and are collectively referred to as CSN<sub>medial</sub>. *Khl14* expression delineates *Khl14*-positive CSN<sub>BC-lat</sub> from *Khl14*-negative CSN<sub>medial</sub>. Nearly all CSN<sub>TL</sub> express *Crim1* while CSN<sub>BC-lat</sub> are *Crim1*-negative. (B) Prior gene expression analysis of CSN<sub>BC-lat</sub> and CSN<sub>medial</sub> identified *Cbln1* as a gene that is not expressed by CSN<sub>BC-lat</sub> (blue) but whose expression increases from P1 to P7 in CSN<sub>medial</sub> (red) (Sahni et al., 2021a). (C) *In situ* hybridization confirms that *Cbln1* is expressed in layer V, where CSN reside. *Cbln1* expression increases from P1 to P7 and is restricted to medial layer V throughout the rostro-caudal extent of sensorimotor cortex. Scale bars are 1mm.

across all sections in Adobe Photoshop using the “Lighten” mode with 100% opacity. This single two-dimensional image per mouse was converted into a monochrome image. To quantify axon extension, we cropped the single image per mouse into dorso-ventral rectangular regions at five rostro-caudal locations (rostral-most, 25% caudal, 50% caudal, 75% caudal, and caudal-most). In each such rectangular region, the CST was then selected as the region-of-interest, and fluorescence intensity was measured in ImageJ. Background fluorescence intensity was measured at an immediately adjacent location in the image and subtracted from this measurement. Intensity at each rostrocaudal level was then normalized to the intensity at the rostral-most limit of the thoracic cord. If no labeled axons were present at the rostrocaudal limit in an individual case, the intensity was set to 0 in that case.

For all of the experiments, the experimenter analyzing the images remained blinded to the experimental conditions.

#### Experimental design and statistical analysis

Data are presented as mean  $\pm$  SEM (standard error of mean), with *n* indicating the number of mice used in each group for comparison. The Student’s T-test was used to assess whether the proportion of CSN axons that reach thoracic T1-T2 from cervical C1-C2 or that reach lumbar L1-L2 from cervical C1-C2 was significantly different between mice injected with GFP (control) or *Cbln1*. We used the two-tailed Student’s T test for the *in utero* electroporation experiment, then used the one-tailed

Student’s T test in the AAV injection experiments to test the hypothesis that *Cbln1* promotes axon extension into the thoracic spinal cord. To model the distribution of the proportion of axons that reach T1-T2 from cervical C1-C2 (T1/C1) following injection with either control AAV-EGFP or AAV-*Cbln1*, we fit a mixture model of two Gaussians using the R package *mixtools*. The two-tailed Student’s T test was also used to compare the proportion of retrogradely-labeled neurons at distinct rostral-caudal levels when comparing WT and *Cbln1* null mice. We used a two-way ANOVA with repeated measures followed by Fisher’s least significant difference posthoc test for the axon extension analyses. Data distribution was assumed to be normal, but this was not formally tested. Male and female mice were used without distinction in experiments.

#### Results

##### *Cbln1* is expressed by CSN in medial, but not lateral, sensorimotor cortex during early postnatal development

We previously performed differential gene expression analysis to identify potential candidate molecular controls over CSN axon targeting to bulbar-cervical versus thoraco-lumbar spinal segments (Sahni et al., 2021a). We compared gene expression at three critical timepoints, P1, P4, and P7, between CSN in lateral sensorimotor cortex (CSN<sub>BC-lat</sub>), which extend projections exclusively to bulbar-cervical spinal segments, and CSN in medial sensorimotor cortex (CSN<sub>medial</sub>), with two interspersed and

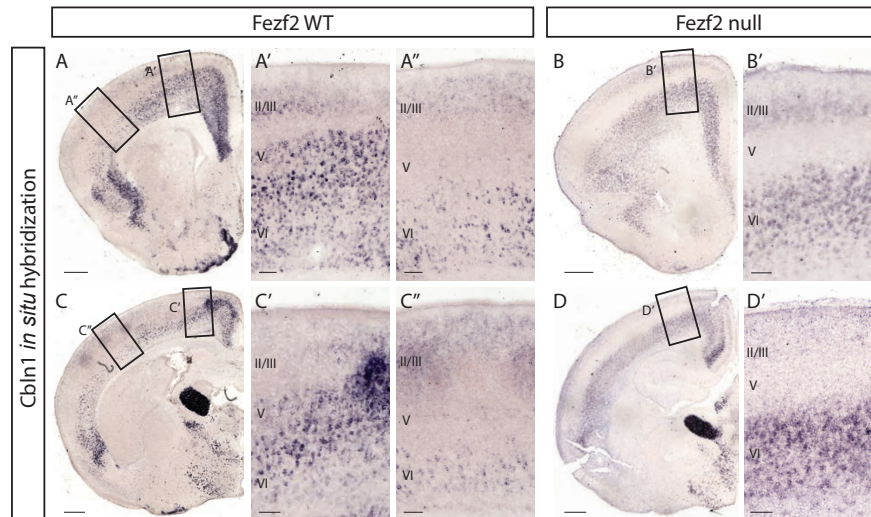

Figure 2: **Cbln1 is specifically expressed by CSN in layer V.** *In situ* hybridization at P7 shows that *Cbln1* is expressed in medial layer V in *Fezf2* WT (A,C) but not in *Fezf2* null (B,D) mice. *Fezf2* null mice completely lack CSN (Molyneaux et al., 2005; Chen et al., 2005). This indicates that *Cbln1* is expressed only by CSN in layer V in medial sensorimotor cortex. Scale bars are 100  $\mu$ m for insets and 500  $\mu$ m for other images.

molecularly distinct subpopulations that extend projections to both bulbar-cervical (CSN<sub>BC-med</sub>) and thoraco-lumbar (CSN<sub>TL</sub>) segments (schematized in Fig. 1A). By P4, CSN<sub>TL</sub>, in contrast to CSN<sub>BC-lat</sub> and CSN<sub>BC-med</sub>, extend axon projections toward distal spinal cord segments (Bareyre et al., 2005; Kamiyama et al., 2015; Sahni et al., 2020, 2021a). To identify candidate molecular controls that control CSN<sub>TL</sub> axonal targeting specifically within CSN<sub>medial</sub>, we previously investigated genes that exhibit significant differential expression between CSN<sub>BC-lat</sub> and CSN<sub>medial</sub> at P4 (Sahni et al., 2021a,b). This work identified multiple candidate molecular regulators of axon targeting and collateralization, including *Crim1* as both a unique identifier of CSN<sub>TL</sub>, and a molecular control that is both necessary and sufficient to direct CSN axon extension to thoraco-lumbar segments. This further validated the original differential gene expression analyses to identify critical regulators over segmentally-specific CSN axon targeting.

Another candidate molecular control identified by this approach is *Cbln1*, which is specifically expressed by CSN<sub>medial</sub> but not by CSN<sub>BC-lat</sub>, with peak differential expression at P4 and P7 (Fig. 1B). This peak coincides with the period when CSN<sub>TL</sub> axons extend past the cervical cord toward thoraco-lumbar segments. This time course of significant differential expression along with known roles for Cbln1 and its family members in synaptogenesis (Hirai et al., 2005; Stevens et al., 2007; Kusnoor et al., 2010; Matsuda et al., 2010; Uemura et al., 2010; Seigneur and Südhof, 2018; Ibata et al., 2019; Takeo et al., 2021) suggested that Cbln1 might function in controlling these processes by some or all CSN<sub>medial</sub>.

To investigate this hypothesis, we first confirmed these transcriptomic data by investigating *Cbln1* expression in the developing sensorimotor cortex using *in situ* hybridization. We examined expression at the three developmental times analyzed by differential gene expression analysis— P1, P4, and

P7. These experiments identify that, at all three developmental times, *Cbln1* is expressed in medial, but not lateral, layer V (Fig. 1C-E). *Cbln1* expression remains restricted to medial layer V throughout the rostro-caudal extent of the sensorimotor cortex (Fig. 1C-E).

To determine whether *Cbln1* is specifically expressed by CSN in layer V, we investigated *Cbln1* expression in *Fezf2* null mice, which completely lack CSN (Chen et al., 2005; Molyneaux et al., 2005). At P7, *Cbln1* expression in layer V is completely abolished in *Fezf2* null mice, confirming that *Cbln1* is expressed specifically by CSN in layer V (Fig. 2). The abolition of *Cbln1* expression in medial layer V in *Fezf2* null mice was also observed at P1 and P4 (data not shown). As expected, *Cbln1* expression in layers II/III and VI remains unchanged in *Fezf2* null mice (Fig. 2). This specific expression of *Cbln1* by CSN<sub>medial</sub> throughout early postnatal development suggests that Cbln1 might function in a CSN subpopulation-specific manner.

#### *Cbln1* is expressed in neocortical and subcortical regions during early postnatal development

To rigorously investigate the spatial and temporal course of *Cbln1* expression in sensorimotor cortex from development into maturity, we performed *in situ* hybridization for *Cbln1* in WT mice at E18.5, P1, P4, P7, P10, P14, P21, P28, and adult (>3 month old). At E18.5, *Cbln1* is not expressed in the sensorimotor cortex (data not shown), indicating that Cbln1 is not required for early CSN development. At P1, *Cbln1* is expressed in medial layer V throughout the rostral-caudal extent of sensorimotor cortex (Fig. 3A,B). *Cbln1* expression then steadily increases in medial layer V from P4 to P7 (Fig. 2A,C, Fig. 3C,D). This expression decreases slightly at P10 (Fig. 3E,F). *Cbln1* is expressed at very low levels in layer V by P14, and is absent in layer V by P21 (Fig. 3G-K). *Cbln1* expression was never observed in lateral layer V at any time point (Fig. 3). These results

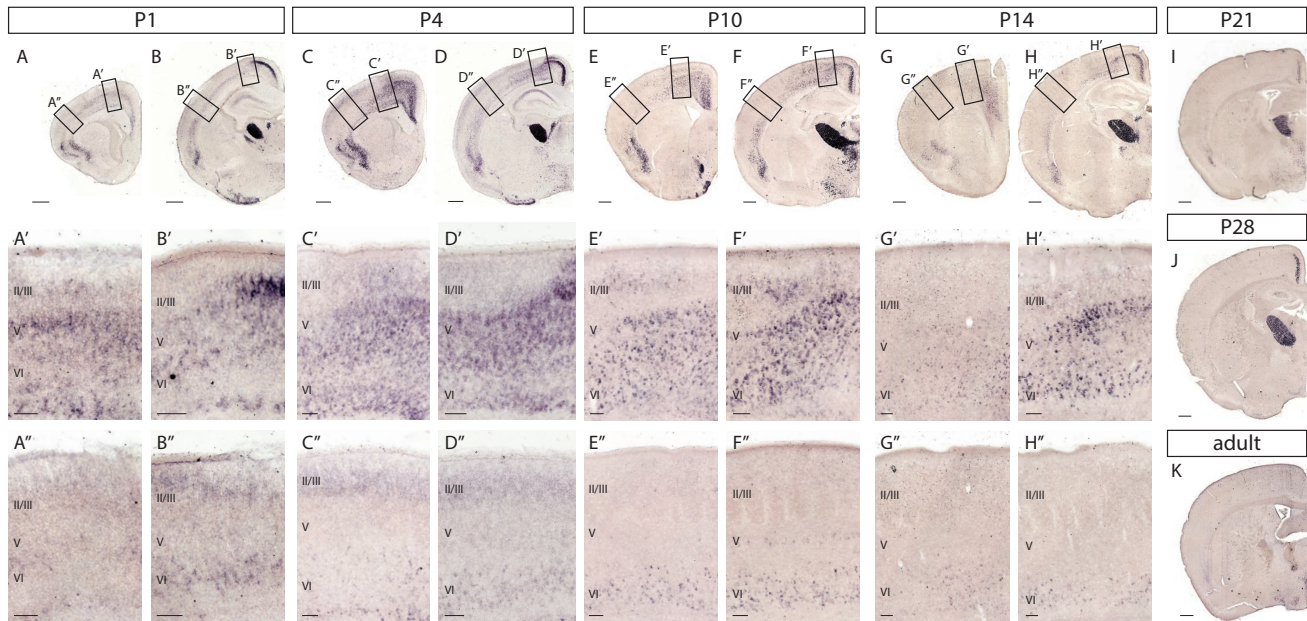

Figure 3: **Time course of *Cbln1* expression.** *Cbln1* is expressed throughout the rostro-caudal extent of sensorimotor cortex in medial but not lateral layer V at P1 (A,B), P4 (C,D), P10 (E,F), and P14 (G,H). *Cbln1* expression in layer V is absent in P21 (I), P28 (J), and in >3 month old (K) mice. Scale bars are 100µm for insets and 500µm for all other images.

confirm the initial observations of differential *Cbln1* expression by CSN<sub>medial</sub> versus CSN<sub>BC-lat</sub> (Sahni et al., 2021a). Further, these results also highlight the temporal dynamics of *Cbln1* expression with peak expression around P7 and declining expression levels thereafter.

Within the cortex, *Cbln1* is also expressed in other layers in the neocortex and in subcerebral regions during postnatal development. In layer VI, *Cbln1* is expressed at low levels rostral-laterally. *Cbln1* expression in layer VI increases in caudomedial sensorimotor cortex from P1 until P10, and is present at low levels by P14 (Fig. 2, Fig. 3). *Cbln1* is expressed in medial layers II/III, with a higher expression level in caudal versus rostral sensorimotor cortex (Fig. 3). *Cbln1* is also highly expressed in the cingulate and piriform cortex from P1 to P28, with expression decreasing with age (Fig. 3). Consistent with previous reports (Iijima et al., 2007; Kusnoor et al., 2010; Otsuka et al., 2016), we find *Cbln1* is also very highly expressed outside the neocortex - in the thalamus and the hypothalamus from E18.5 into adulthood, and in the septum at P10 and P14 (Fig. 3).

Although *Cbln1* is expressed in many neocortical and subcerebral regions, its specific restriction within layer V to medial sensorimotor cortex combined with its distinct time course of expression suggests that *Cbln1* might perform CSN<sub>TL</sub>-specific functions. Interestingly, *Cbln1* expression in layer V is largely confined to early postnatal development, with expression increasing from P1 to P7 and then decreasing by P14 (Fig. 2, Fig. 3). This corresponds with the time course of CSN<sub>TL</sub> axon extension to caudal spinal segments during development. CSN<sub>TL</sub> first extend axons toward the lumbar cord by P5, with the number of axons reaching the lumbar cord steadily increasing from P7 to P14, with continued extension up to P28

(Bareyre et al., 2005; Kamiyama et al., 2015; Sahni et al., 2020, 2021a). The restriction of *Cbln1* expression to medial CSN with peak expression coincident with the time period of CSN<sub>TL</sub> axon extension to thoracic and lumbar segments, suggests that *Cbln1* might function during CSN<sub>TL</sub> axon extension. Further, the temporal restriction of *Cbln1* expression in layer V to early postnatal development suggests that the function of *Cbln1* within CSN is potentially distinct from the function of *Cbln1* in the cerebellum, where it is constitutively expressed throughout development and adulthood, and is required for both the proper formation and maintenance of synapses between Purkinje neurons and parallel fibers (Hirai et al., 2005).

#### *Other cerebellin family members are not expressed by CSN*

*Cbln1* forms homo- and hetero-complexes with itself or with other members of the *Cbln* family, and these complexes are known to perform varied, compensatory, and redundant functions (Pang et al., 2000a; Bao et al., 2006; Iijima et al., 2007; Miura et al., 2009; Joo et al., 2011; Rong et al., 2012; Seigneur et al., 2018; Seigneur and Südhof, 2018). To determine whether other *Cbln* family members are expressed by CSN<sub>medial</sub> and might potentially interact with *Cbln1* in CSN<sub>medial</sub>, we examined previously published gene expression datasets and performed *in situ* hybridization in wild-type mice.

Differential gene expression analysis comparing CSN<sub>BC-lat</sub> and CSN<sub>medial</sub> indicates that *Cbln2*, *Cbln3*, and *Cbln4* are not expressed, or expressed at very low levels, by either CSN<sub>BC-lat</sub> or CSN<sub>medial</sub> during early postnatal development (Sahni et al., 2021a) (Fig. 4A,E,I). Accordingly, there is also no detectable difference between *Cbln2*, *Cbln3*, or *Cbln4* expression in CSN<sub>BC-lat</sub> compared to CSN<sub>medial</sub>, suggesting that these genes

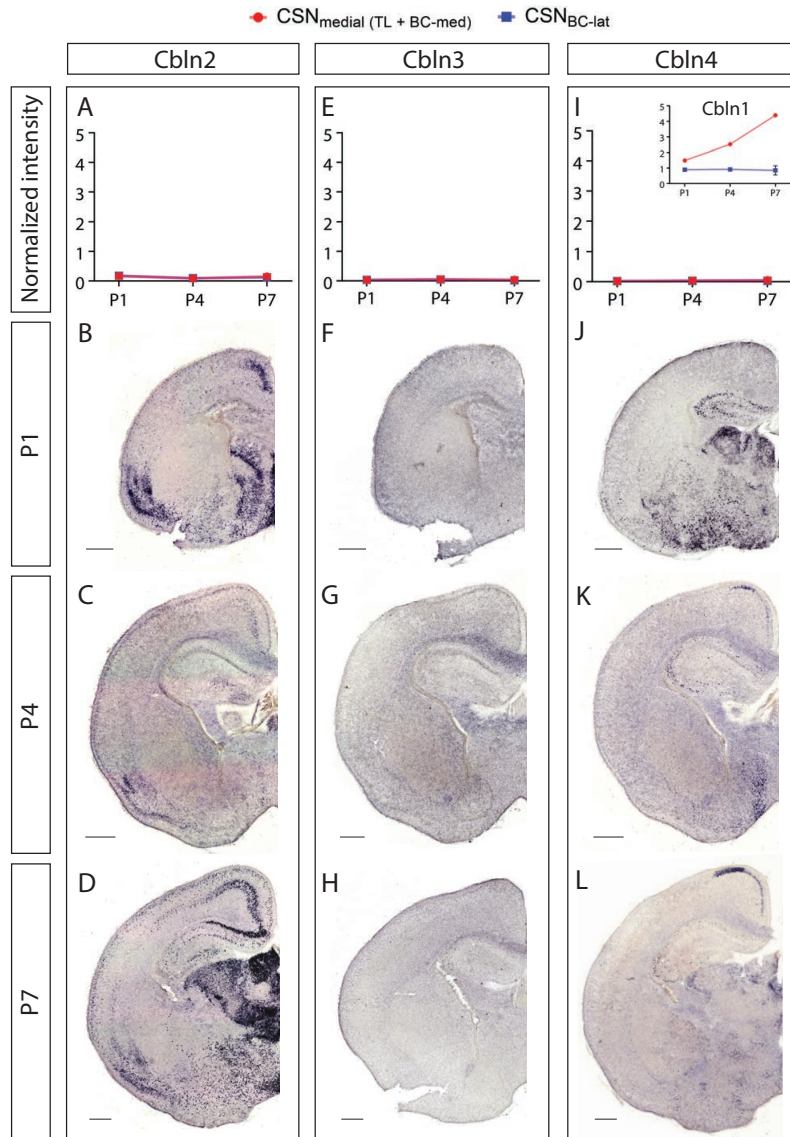

Figure 4: **Other *Cbln* family members are not expressed by developing CSN.** Prior differential gene expression analysis (Sahni et al., 2021a) identified *Cbln1* (inset in I) as expressed by CSN<sub>medial</sub>. In that dataset, *Cbln2* (A), *Cbln3* (E), and *Cbln4* (I) exhibit no expression by CSN<sub>medial</sub> (blue) or CSN<sub>BC-lat</sub> (red) at P1, P4, and P7. *In situ* hybridization at P1 (B, F, J), P4 (C, G, K), and P7 (D, H, L) confirms that all three genes are not expressed in layer V in the developing neocortex. Scale bars are 500 μm.

are unlikely to function in a CSN subpopulation-specific manner. Interestingly, prior gene expression comparisons at late embryonic and early postnatal times found that *Cbln2* expression is enriched in a different neocortical projection neuron subtype, callosal projection neurons (CPN), as compared to CSN, and that *Cbln3* and *Cbln4* are not expressed by CPN or by CSN (Arlotta et al., 2005). Together, these datasets suggest that *Cbln1* functions independently of other *Cbln* family members within CSN<sub>medial</sub>.

*In situ* hybridization in wild-type mice confirmed the differential gene expression analyses. As reported previously (Miura et al., 2006; Seigneur and Südhof, 2017), *Cbln2* is expressed at high levels in cingulate and piriform cortex, and at intermediate levels in layer VI at P1, P4, and P7 (Fig. 4B-D). A small frac-

tion of layer V neurons express *Cbln2* at P1 (Fig. 4B), but these are likely CPN based on the previous transcriptomic analysis (Arlotta et al., 2005). *Cbln3* is not expressed within sensorimotor cortex at P1, P4, or P7 (Fig. 4F-H). Similarly, *Cbln4* is not expressed in layer V, but is expressed in the cingulate at P4 and P7 (Fig. 4J-L). Together with the transcriptomic analyses, these results indicate that *Cbln2*, *Cbln3*, and *Cbln4* expression is likely absent in CSN, and thus, suggest that *Cbln1* function in CSN<sub>medial</sub> during early postnatal development is independent of other *Cbln* family members.

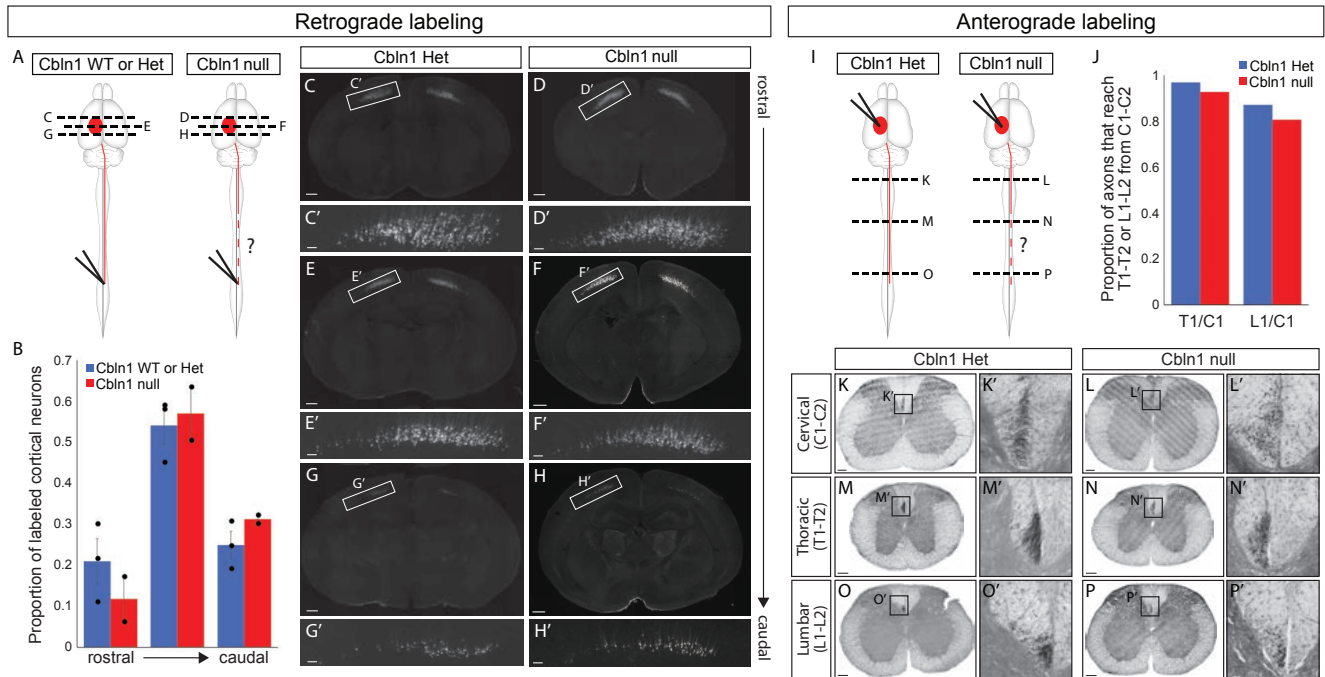

**Figure 5: *Cbln1* is not required for axon extension to lumbar L1-L2.** (A) Experimental outline: Retrograde labeling with injection of CTB-555 at lumbar L1-L2 was performed in *Cbln1* WT, *Cbln1* Het, and *Cbln1* null mice at P5, and the number of retrogradely labeled neurons throughout the rostro-caudal extent of medial sensorimotor cortex was analyzed at P7. (B) There is no significant difference in the proportion of retrogradely labeled CSN in medial sensorimotor cortex at rostral ( $p = 0.34$ ), middle ( $p = 0.73$ ), or caudal ( $p = 0.24$ ) levels by the two-tailed Student's T-test between *Cbln1* WT or Het ( $n = 3$ ) and *Cbln1* null ( $n = 2$ ) mice. (C-H) Representative rostral, middle, and caudal sections from a *Cbln1* Het and a *Cbln1* null mouse. Scale bars are  $100\mu\text{m}$  for insets and are  $500\mu\text{m}$  for all other images. (I) Experimental outline: Anterograde labeling via biotinylated dextran amine (BDA) iontophoresis into caudomedial sensorimotor cortex was performed in *Cbln1* Het and *Cbln1* null mice at P28, and the number of BDA-labelled axons at cervical C1-C2, thoracic T1-T2, and lumbar L1-L2 was analyzed at P35. (J) There is no overt difference in the proportion of axons that reach thoracic T1-T2 or lumbar L1-L2 from cervical C1-C2 between *Cbln1* Het and *Cbln1* null mice. (K-P) Representative axial sections from cervical C1-C2, thoracic T1-T2, and lumbar L1-L2 in *Cbln1* Het and *Cbln1* null mice. Scale bars are  $100\mu\text{m}$ .

### *Cbln1* is not required for CSN<sub>TL</sub> axon extension to the thoraco-lumbar spinal cord

Since *Cbln1* expression levels coincide with the peak period of CSN<sub>TL</sub> axon extension to thoracic and lumbar segments, we next investigated whether *Cbln1* is necessary for CSN<sub>TL</sub> axon extension to these distal spinal segments. We analyzed *Cbln1* null mice using anterograde and retrograde labeling (Hirai et al., 2005). We injected the retrograde tracer Cholera Toxin Subunit B conjugated with Alexa-Fluor 555 (CTB-555) into lumbar L1-L2 in *Cbln1* wild-type (WT), *Cbln1* heterozygous (Het), and *Cbln1* null mice at P5, at which time the first CSN<sub>TL</sub> axons have reached the lumbar cord, and analyzed the number of retrogradely labeled CSN in sensorimotor cortex at P7 (Fig. 5A). As expected, labeled CSN are located caudomedially in sensorimotor cortex. We observe no overt difference in the overall distribution or number of retrogradely labeled CSN in *Cbln1* null mice (Fig. 5B-H).

Next, we injected the anterograde tracer biotinylated dextran amine (BDA) into the caudomedial sensorimotor cortex at P28 and analyzed the brain and spinal cord at P35 to determine whether *Cbln1* might be required for the maintenance of lumbar axon extension (Fig. 5I). Once again, there is no overt difference in the proportion of CSN axons at cervical C1-C2 that reach thoracic T1-T2 or lumbar L1-L2 between *Cbln1* WT and *Cbln1* null mice (Fig. 5J-P). These results suggest that *Cbln1*

is not necessary for CSN<sub>TL</sub> axon extension to the thoracic and lumbar cord.

### *Mis-expression of Cbln1 in CSN<sub>BC-lat</sub> leads to aberrant axon extension past the cervical cord toward distal thoraco-lumbar spinal segments*

Although *Cbln1* is not required for CSN<sub>TL</sub> axon extension to distal thoraco-lumbar spinal segments, we wondered whether *Cbln1* might be sufficient to direct long CSN axon extension. We had previously established that mis-expression of *Crim1*, a CSN<sub>TL</sub>-specific control, in CSN<sub>BC-lat</sub> can redirect a subset of their axons to caudal thoracic segments (Sahni et al., 2021b). We therefore investigated whether *Cbln1* is similarly sufficient to direct thoraco-lumbar axon extension by CSN<sub>BC-lat</sub>, which normally do not express *Cbln1*. To test this hypothesis, we introduced a plasmid expressing *Cbln1* and an EGFP reporter into CSN<sub>BC-lat</sub> via *in utero* electroporation at E12.5. Control mice received a plasmid expressing EGFP alone (schematized in Fig. 6A). CSN<sub>BC-lat</sub> axons normally reach the caudal cervical cord by P1 and never extend past the rostral-most segments in the thoracic cord (Sahni et al., 2021a). We examined electroporated mice at P4, by which time the most distally extending CSN<sub>BC-lat</sub> axons have normally terminated within the caudal cervical or rostral-most segments of the thoracic cord.



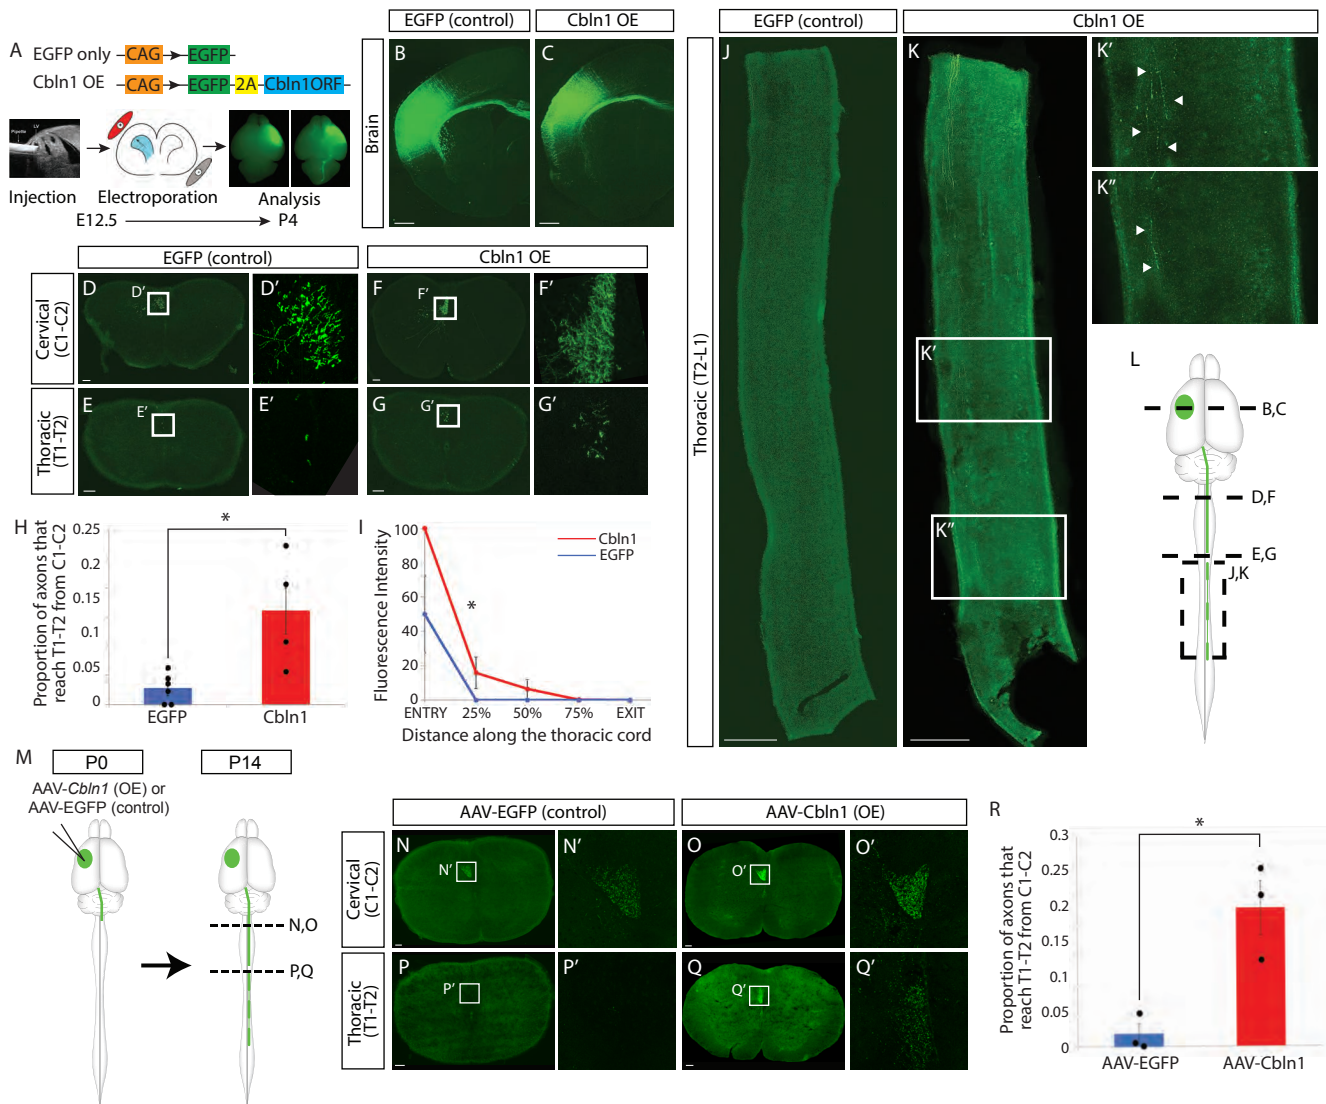

**Figure 6: *Cbln1* overexpression in  $CSN_{BC-lat}$  is sufficient to re-direct axon extension to distal thoracic spinal segments.** (A) Experimental outline: In one set of experiments, plasmids were designed to express either *EGFP* alone, or both *EGFP* and *Cbln1* (*Cbln1* OE). The constructs were delivered to developing  $CSN_{BC-lat}$  in lateral cortex using *in utero* electroporation at E12.5, and tissue was collected at P4 for analysis.  $CSN_{BC-lat}$  axons were visualized using immunocytochemistry for *EGFP*. (B,C) Electroporation location and distribution in the brain are well-matched between *EGFP* (control) and *Cbln1* OE mice. (D-G) The number of  $CSN_{BC-lat}$  axons at cervical C1-C2 and thoracic T1-T2 were counted in axial sections of the spinal cord in *EGFP* and *Cbln1* OE mice. (H) There are significantly more axons that reach thoracic T1-T2 from cervical C1-C2 in *Cbln1* OE (red,  $n = 4$ ) compared to *EGFP* (control; blue,  $n = 6$ ) mice ( $p = 0.01$  by two-tailed Student's *t*-test). (I) CST fluorescence intensity was quantified along the rostro-caudal extent of the thoracic cord and normalized to the fluorescence intensity at thoracic T2. Significantly more *Cbln1*-expressing  $CSN_{BC-lat}$  axons extend into the distal thoracic cord when compared to *EGFP* controls ( $p = 0.04$  by two-way ANOVA with repeated measures followed by Fisher's least significant difference posthoc test). (J-K)  $CSN_{BC-lat}$  axons extend into the distal thoracic cord in thoracic sagittal sections in *Cbln1* OE (arrowheads in K', K'') but not in *EGFP* (control) mice. (L) Schematic indicating anatomical location of sections displayed in B-K. (M) Experimental outline: In a second set of experiments, AAV particles engineered to express either *EGFP* alone (AAV-*EGFP*) or both *EGFP* and *Cbln1* (AAV-*Cbln1*) were injected into rostralateral sensorimotor cortex at P0 to test whether *Cbln1* is sufficient to re-direct axon extension by postmitotic  $CSN_{BC-lat}$ . AAV-injected mice were then analyzed at P14. (N-Q) The number of axons that reach cervical C1-C2 and thoracic T1-T2 were counted in axial sections of the spinal cord in AAV-*EGFP* and AAV-*Cbln1* mice. (R) There are significantly more axons that reach thoracic T1-T2 from cervical C1-C2 in AAV-*Cbln1* (red,  $n = 3$ ) compared to AAV-*EGFP* (blue,  $n = 3$ ) ( $p = 0.02$  by one-tailed Student's *t*-test). Scale bars are  $100\mu m$  for D-G and N-Q and  $500\mu m$  for B, C, J, and K.

We first confirmed that all electroporations were restricted to lateral sensorimotor cortex where  $CSN_{BC-lat}$  reside (Fig. 6B,C). We next investigated the percentage of  $CSN_{BC-lat}$  axons that reach the rostral thoracic cord (T1-T2) from the rostral cervical cord (C1-C2). Strikingly, when *Cbln1* is misexpressed in  $CSN_{BC-lat}$ , a 6-fold higher percentage of axons reach T1-T2 from C1-C2 (T1/C1) compared to the control ( $16.1\% \pm 4.0\%$

for *Cbln1* mis-expression,  $2.8\% \pm 1.3\%$  for the control;  $p = 0.01$ ) (Fig. 6D-H). This indicates that *Cbln1* mis-expression aberrantly directs a higher percentage of  $CSN_{BC-lat}$  axons to extend past their normal cervical targets into the thoracic cord by P4.

We next investigated whether these re-directed axons from *Cbln1*-expressing  $CSN_{BC-lat}$  extend further caudally toward

more distal thoracic segments. As expected, in control mice, CSN<sub>BC-lat</sub> axons do not extend past the rostral-most segments of the thoracic cord (Fig. 6J). In striking contrast, not only do a significantly larger number of CSN<sub>BC-lat</sub> axons reach the rostral thoracic cord upon Cbln1 mis-expression, a subset of these axons reach the distal-most segments of the thoracic cord (T13) at P4 (Fig. 6K). Quantification of CST fluorescence intensity along the rostro-caudal extent of the thoracic cord (normalized to the fluorescence intensity at thoracic T2), reveals that significantly more Cbln1-expressing CSN<sub>BC-lat</sub> axons extend into the distal thoracic cord when compared to controls ( $p = 0.04$ ) (Fig. 6I). Indeed, no axons even reached T2 in 3 of the 6 control samples (Fig. 6I). Interestingly, although axon collateralization by CSN<sub>BC-lat</sub> is well underway by P4 (Bareyre et al., 2005), we do not observe any collateralization by the aberrantly extended CSN<sub>BC-lat</sub> axons upon Cbln1 mis-expression in the thoracic cord (Fig. 6K). Together, these data indicate that Cbln1 is sufficient to re-direct CSN<sub>BC-lat</sub> axon extension past the cervical cord toward thoracic spinal segments but does not promote axon collateralization.

#### *Postnatal mis-expression of Cbln1 in CSN<sub>BC-lat</sub> leads to aberrant long CSN<sub>BC-lat</sub> axon extension*

The time course of *Cbln1* expression suggests that its function is required specifically during the period of CSN<sub>TL</sub> axon extension. However, since mis-expression by *in utero* electroporation begins in progenitors and continues into postmitotic neurons, there remained the unlikely possibility that the effect of Cbln1 mis-expression on CSN<sub>BC-lat</sub> axon extension is due to alterations in early CSN<sub>BC-lat</sub> specification before their axons reach the spinal cord, ultimately causing their aberrant axon extension later at P4. To directly investigate this possibility, we performed mis-expression in CSN<sub>BC-lat</sub> at P0 via AAV-mediated gene delivery. We generated AAV particles engineered to express Cbln1 and an EGFP reporter (AAV-Cbln1). Control mice received AAV particles engineered to express EGFP alone (AAV-EGFP). We injected these particles into the rostralateral cortex of P0 mice under ultrasound guided backscatter microscopy and examined CSN<sub>BC-lat</sub> axon extension at P14 (schematized in Fig. 6M), at which point CSN axonal projections have been pruned and the adult connectivity pattern of the CST is largely established (Bareyre et al., 2005; Sahni et al., 2020, 2021a).

As with embryonic mis-expression of Cbln1 in CSN<sub>BC-lat</sub>, postnatal Cbln1 mis-expression leads to aberrant CSN<sub>BC-lat</sub> axon extension past the cervical cord into the thoracic spinal cord. We quantified the number of axons that reach thoracic T1-T2 compared to the number of axons at cervical C1-C2 in axial sections from mice injected with either AAV-EGFP or AAV-Cbln1 (Fig. 6N-R). There is a significant increase in the percentage of axons that reach thoracic T1-T2 at P14 compared to controls ( $22.8\% \pm 4.5\%$  for Cbln1 mis-expression,  $2.0\% \pm 1.7\%$  for the control;  $p = 0.02$ ) (Fig. 6R). As with the *in utero* electroporation experiments, these aberrantly extended CSN<sub>BC-lat</sub> axons upon Cbln1 mis-expression at P0 also fail to collateralize in the thoracic cord (data not shown). Therefore, postnatal mis-expression of Cbln1 at P0 is sufficient to di-

rect CSN<sub>BC-lat</sub> axons past the cervical cord and into the thoracic cord. Together, these data combined with the results from *in utero* mis-expression experiments indicate that Cbln1 regulates axon extension without affecting CSN axon collateralization. This is in contrast to known functions of Cbln1 as a critical synaptic organizer in the cerebellum, striatum, and other brain regions (Hirai et al., 2005; Kusnoor et al., 2010; Seigneur and Südhof, 2018), and represents a unique function of Cbln1 in controlling CSN axon extension independent of effects on axon collateralization or synapse formation.

#### *Postnatal overexpression of Cbln1 in CSN<sub>medial</sub> is sufficient to drive long CSN axon extension to the thoraco-lumbar spinal cord*

The experiments above indicate that CSN<sub>TL</sub> axon extension to caudal thoracic and lumbar segments does not require Cbln1 function, but that Cbln1 is sufficient to re-direct CSN<sub>BC-lat</sub> axons to the caudal thoracic cord. Unlike CSN in lateral sensorimotor cortex, which only project to bulbar-cervical segments (CSN<sub>BC-lat</sub>), CSN<sub>medial</sub> include distinct subpopulations with projections to bulbar-cervical (CSN<sub>BC-med</sub>) or thoraco-lumbar segments (CSN<sub>TL</sub>). Previous work has established that CSN<sub>BC-lat</sub>, CSN<sub>BC-med</sub>, and CSN<sub>TL</sub> are distinct, molecularly delineated subpopulations that can be distinguished before CSN axons have even reached the spinal cord (schematized in Fig. 1A) (Sahni et al., 2021a).

To determine whether Cbln1 controls axon extension past the cervical cord by multiple molecularly and spatially distinct subpopulations, we next investigated whether Cbln1 overexpression is sufficient to re-direct CSN<sub>BC-med</sub> axons toward caudal thoracic and lumbar segments. We overexpressed Cbln1 at P0 via AAV-mediated gene delivery in medial sensorimotor cortex, where *Cbln1* is normally expressed by only a subset of CSN<sub>medial</sub>. We injected the medial cortex of P0 mice with either AAV particles engineered to express Cbln1 and an EGFP reporter (AAV-Cbln1) or AAV particles engineered to express EGFP alone (AAV-EGFP). We examined CSN<sub>medial</sub> axon extension at P14 by quantifying CST fluorescence intensity at thoracic T1-T2 and lumbar L1-L2, normalized to the fluorescence intensity at cervical C1-C2 in axial sections from mice injected with either AAV-Cbln1 or AAV-EGFP (schematized in Fig. 7A).

Since there is no positive molecular identifier for CSN<sub>BC-med</sub>, we investigated their axon targeting as a subset of the broader CSN<sub>medial</sub> subpopulation. Given the two-population diversity of CSN<sub>medial</sub>, injections in medial sensorimotor cortex will label varying proportions of CSN<sub>BC-med</sub> and CSN<sub>TL</sub>, since both subpopulations reside interdigitated in medial sensorimotor cortex. Therefore, we expected these injections to result in greater variability in the proportion of labeled CSN<sub>medial</sub> axons that reach thoracic T1-T2 from cervical C1-C2 (we refer to this ratio as T1/C1). Indeed, we observe high variance in the distribution of T1/C1 following injection with control AAV-EGFP (Fig. 7B). Importantly, the AAV-EGFP-injected mice clustered broadly into two groups, likely reflecting the predicted differences in the extent of labeling between CSN<sub>BC-med</sub> and CSN<sub>TL</sub> in each individual mouse. Therefore, we modeled the distribution of

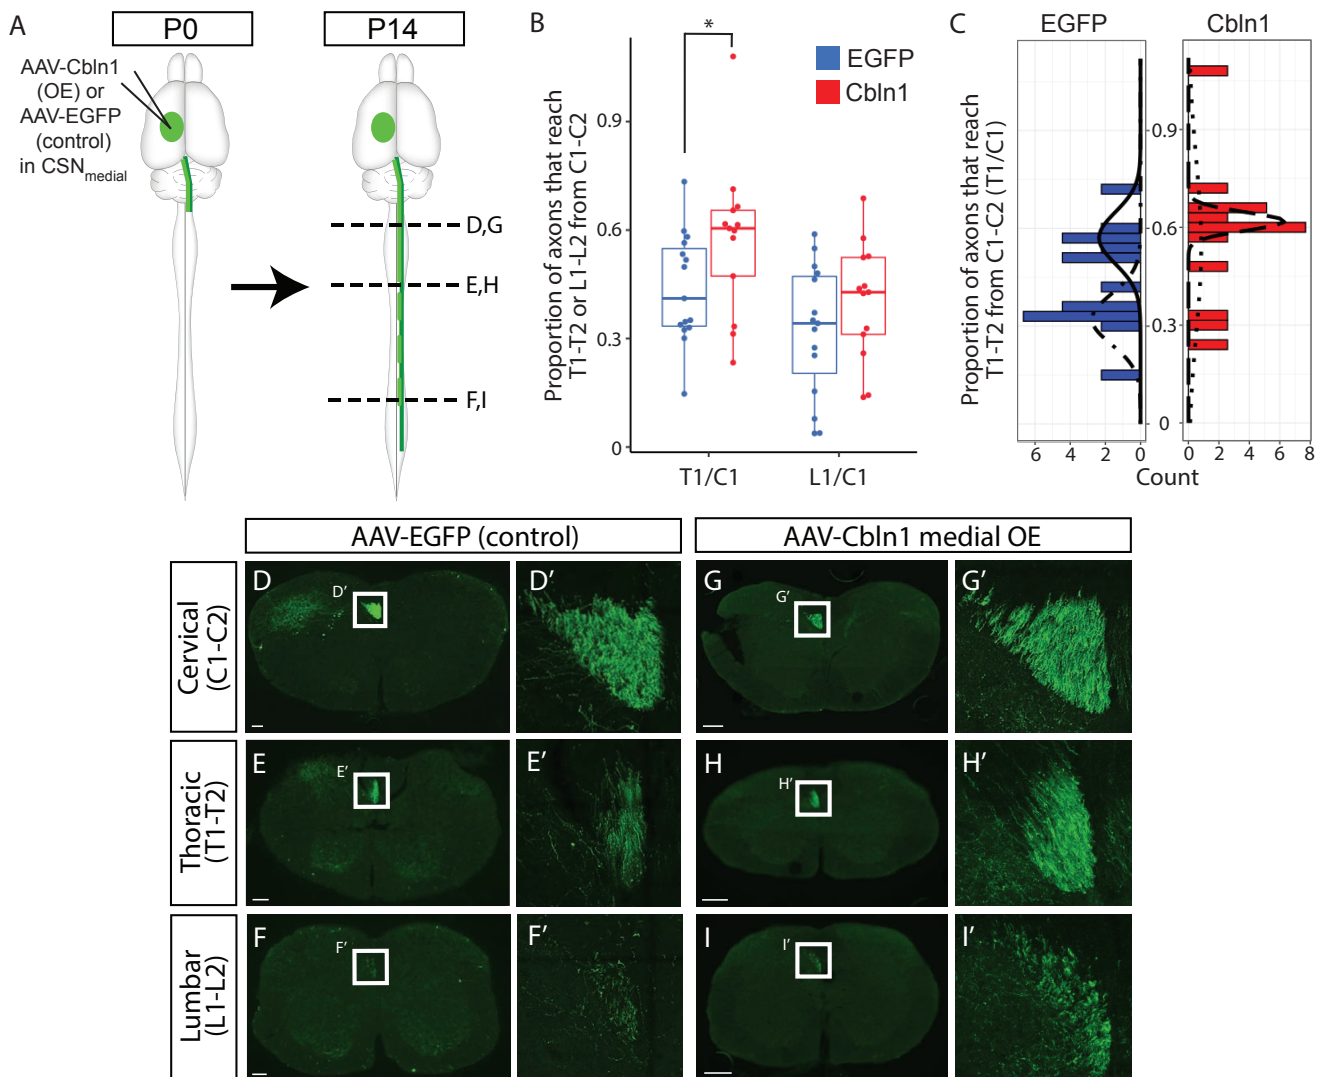

**Figure 7: *Cbln1* overexpression in  $CSN_{medial}$  is sufficient to increase the number of axons extending past the cervical spinal cord.** (A) Experimental outline: AAV particles engineered to express either *EGFP* alone (AAV-EGFP, control) or both *EGFP* and *Cbln1* (AAV-Cbln1) were injected into medial sensorimotor cortex at P0. AAV-injected mice were analyzed at P14. (B) CST intensity was quantified in axial sections at cervical C1-C2, thoracic T1-T2, and lumbar L1-L2. The proportion of axons that reach thoracic T1-T2 from cervical C1-C2 (T1/C1) is significantly higher in AAV-Cbln1 (red,  $n = 13$ ) compared to AAV-EGFP (blue,  $n = 15$ ) ( $p = 0.03$  by one-tailed Student's t-test). In contrast, the proportion of axons that reach lumbar L1-L2 from cervical C1-C2 is not significantly different between AAV-Cbln1 and AAV-EGFP mice ( $p = 0.11$  by one-tailed Student's t-test). (C) We modeled the distribution of T1/C1 in control AAV-EGFP or AAV-Cbln1 injected mice as a mixture of two Gaussians. The distribution of T1/C1 in control AAV-EGFP injected mice appears bimodal with one Gaussian centered at  $0.32 \pm 0.08$  and the other at  $0.57 \pm 0.08$ , likely reflecting variability in the proportion of  $CSN_{BC-med}$  or  $CSN_{TL}$  labeled by each injection. In contrast, the distribution of T1/C1 in AAV-Cbln1 injected mice appears unimodal with one Gaussian centered at  $0.54 \pm 0.27$  and the other centered at  $0.62 \pm 0.03$ . These Gaussians are similar to the Gaussian with control AAV-EGFP injections centered at 0.57, which is likely comprised of a higher proportion of  $CSN_{TL}$  compared to  $CSN_{BC-med}$ . This suggests that *Cbln1* overexpression might specifically shift the segmental targeting of  $CSN_{BC-med}$  past the bulbar-cervical cord into the thoraco-lumbar cord, but not overtly affect the segmental targeting of  $CSN_{TL}$ . (D-I) Representative axial sections from cervical C1-C2, thoracic T1-T2, and lumbar L1-L2 from control AAV-EGFP and AAV-Cbln1 injected mice. Scale bars are 100µm.

T1/C1 as a mixture of two Gaussians (Fig. 7C). The distribution of T1/C1 following the injection of control AAV-EGFP appears bimodal, with one Gaussian centered at  $0.32 \pm 0.08$ —likely reflecting a higher proportion of  $CSN_{BC-med}$  relative to  $CSN_{TL}$  in these injections—and the other Gaussian at  $0.57 \pm 0.08$ —likely reflecting a higher proportion of  $CSN_{TL}$  relative to  $CSN_{BC-med}$ .

Despite these differences in the relative numbers of  $CSN_{BC-med}$  and  $CSN_{TL}$  labeled by each injection, we investigated whether *Cbln1* overexpression is sufficient to alter the T1/C1 ratio in AAV-Cbln1-injected mice. As with mis-

expression of *Cbln1* in  $CSN_{BC-lat}$ , we find that overexpression of *Cbln1* in  $CSN_{medial}$  leads to long CSN axon extension past the cervical cord to thoraco-lumbar spinal segments (Fig. 7B-I). There is a significant increase in T1/C1 ( $57.5\% \pm 5.9\%$  for *Cbln1* overexpression,  $43.8\% \pm 3.9\%$  for the control;  $p = 0.03$ ). Intriguingly, we do not find a similar increase in the proportion of axons that reach lumbar L1-L2 from cervical C1-C2 ( $40.3\% \pm 4.5\%$  for *Cbln1* overexpression,  $32.1\% \pm 4.7\%$  for the control;  $p = 0.11$ ) upon *Cbln1* overexpression in  $CSN_{medial}$ .

In contrast with the T1/C1 distribution in control AAV-

EGFP-injected mice, which appears bimodal, the distribution of T1/C1 following *Cbln1* overexpression appears unimodal with the center of both Gaussian distributions around 0.57 (Fig. 7C). This is similar to the Gaussian distribution in the control T1/C1 distribution that is likely enriched for CSN<sub>TL</sub>. Although this analysis does not entail *a priori* cell identification, it suggests that *Cbln1* overexpression might specifically shift the segmental targeting of CSN<sub>BC-med</sub> past the bulbar-cervical cord into the thoraco-lumbar cord, but might not substantially affect the segmental targeting of CSN<sub>TL</sub>. Together with our findings that *Cbln1* mis-expression in CSN<sub>BC-lat</sub> promotes axon extension past their normal cervical targets, these results indicate that *Cbln1* is sufficient to drive axon extension past the cervical cord by multiple spatially and molecularly distinct CSN subpopulations.

*Cbln1* is regulated by *Klh14*, but acts independently of *Crim1* to control CSN long axon extension

We previously identified *Klh14* and *Crim1* as molecular controls expressed by CSN<sub>BC-lat</sub> and CSN<sub>TL</sub>, respectively (Sahni et al., 2021a,b). *Klh14* functions to limit CSN<sub>BC-lat</sub> axons to proximal segments in the cervical spinal cord during early post-natal development. Knockdown of *Klh14* by shRNA leads to aberrant CSN<sub>BC-lat</sub> axon extension toward distal thoracic segments at P4. This aberrant axon extension is accompanied by an upregulation of *Crim1* by CSN<sub>BC-lat</sub>.

To determine whether *Klh14* might also similarly modulate *Cbln1* expression, we examined coronal brain sections from mice at P4 in which *Klh14* shRNA was introduced into CSN<sub>BC-lat</sub> via *in utero* electroporation at E12.5 (Fig. 8A). Strikingly, *Cbln1* is ectopically expressed in layer V in rostralateral sensorimotor cortex where *Klh14* is reduced, but not in the contralateral cortex where *Klh14* expression is normal (Fig. 8B). This strongly suggests that *Cbln1* and *Crim1* expression are both repressed by *Klh14* in CSN<sub>BC-lat</sub> to regulate CSN axon extension.

We also examined whether *Cbln1* overexpression can regulate *Klh14* expression. Coronal brain sections from mice electroporated with *Cbln1* in lateral cortex at E12.5 and analyzed at P4 were examined for *Klh14* expression via *in situ* hybridization (Fig. 8C). There is no difference in *Klh14* expression in the electroporated versus contralateral cortex (Fig. 8D). This strongly suggests that *Klh14* acts upstream of *Cbln1* to repress *Cbln1* expression by CSN<sub>BC-lat</sub>.

Gain-of-function experiments show that *Crim1* and *Cbln1* function at distinct levels of the spinal cord. *Crim1* mis-expression does not increase the proportion of CSN<sub>BC-lat</sub> axons that reach thoracic T1-T2, but it does re-direct the small minority of CSN<sub>BC-lat</sub> axons that reach the thoracic cord to extend farther into the thoracic cord toward caudal thoracic segments (Sahni et al., 2021b). In contrast, *Cbln1* mis-expression significantly increases axon extension to thoracic T1-T2 by both CSN<sub>BC-lat</sub> and CSN<sub>medial</sub>. These data suggest that *Cbln1* and *Crim1* function in distinct pathways, and that *Klh14* acts as an upstream regulator of both *Cbln1* and *Crim1*.

These results led us to investigate whether *Cbln1* and *Crim1* control CSN long axon extension via the same or distinct ge-

netic pathways. We first examined *Crim1* expression in sensorimotor cortex in *Cbln1* WT and *Cbln1* null mice. We detect no differences in *Crim1* expression (Fig. 8I,J). Similarly, we detect no difference in *Cbln1* expression in sensorimotor cortex between *Crim1* WT and *Crim1* null mice (Fig. 8K,L). We further investigated whether *Cbln1* mis-expression in CSN<sub>BC-lat</sub> via *in utero* electroporation at E12.5 might modulate *Crim1* expression when analyzed at P4, and vice versa. There is no difference in *Crim1* expression between *Cbln1*-expressing CSN<sub>BC-lat</sub> compared to the contralateral cortex (Fig. 8E,F). There is also no difference in *Cbln1* expression between *Crim1*-expressing CSN<sub>BC-lat</sub> and the contralateral cortex (Fig. 8G,H). Together, these data indicate that *Crim1* and *Cbln1* act via distinct genetic pathways to control CSN axon extension.

## Discussion

Previous work has identified that CSN subpopulations exhibit striking axon extension specificity during development, and that this specificity is durably maintained into maturity (Sahni et al., 2021a,b). CSN subpopulations with distinct spinal segmental targets are molecularly distinct from the earliest stages of axon extension, even before their axons reach the spinal cord. We previously investigated two molecular controls—*Klh14* and *Crim1*—that both prospectively identify CSN subpopulations with segmentally distinct projections, and control these projections. We identified their critical functions in directing CSN axons to appropriate spinal segmental levels, with dual-directional, complementary regulation toward thoraco-lumbar extension (by *Crim1*) and limiting axon extension past bulbar-cervical segments (by *Klh14*). These results indicate that CSN-intrinsic molecular controls, at least in part, govern CSN axonal targeting specificity (Sahni et al., 2021a,b).

Here, we build on this work to identify a novel role for a member of the cerebellin family, *Cbln1*, in controlling CSN segmental axonal projection targeting. We find that *Cbln1* is expressed specifically by CSN in medial sensorimotor cortex. The time course of *Cbln1* expression by CSN closely aligns with the period of CSN<sub>TL</sub> axon extension to thoracic and lumbar segments. Mis-expression of *Cbln1* in CSN<sub>BC-lat</sub> via either *in utero* electroporation at E12.5 or AAV injection at P0 re-directs CSN<sub>BC-lat</sub> axons past their normal cervical targets to distal segments in the thoraco-lumbar cord. Similarly, *Cbln1* overexpression in CSN<sub>medial</sub> is sufficient to increase the proportion of CSN<sub>medial</sub> axons that extend to thoracic spinal segments. These results indicate that *Cbln1* can direct long axon extension by multiple CSN subpopulations residing in spatially distinct locations in sensorimotor cortex.

This represents a novel function for *Cbln1* in axon extension, independent of its well-described function as a synaptic organizer. *Cbln1* has been characterized extensively in the cerebellum, where it is localized and secreted at presynaptic terminals of cerebellar granule cells, and is instructive for synapse formation between Purkinje cells and the parallel fibers of granule cells (Hirai et al., 2005; Matsuda et al., 2010; Uemura et al., 2010; Iyata et al., 2019). Outside of the cerebellum, *Cbln1* has also been shown to play critical roles in both synapse formation

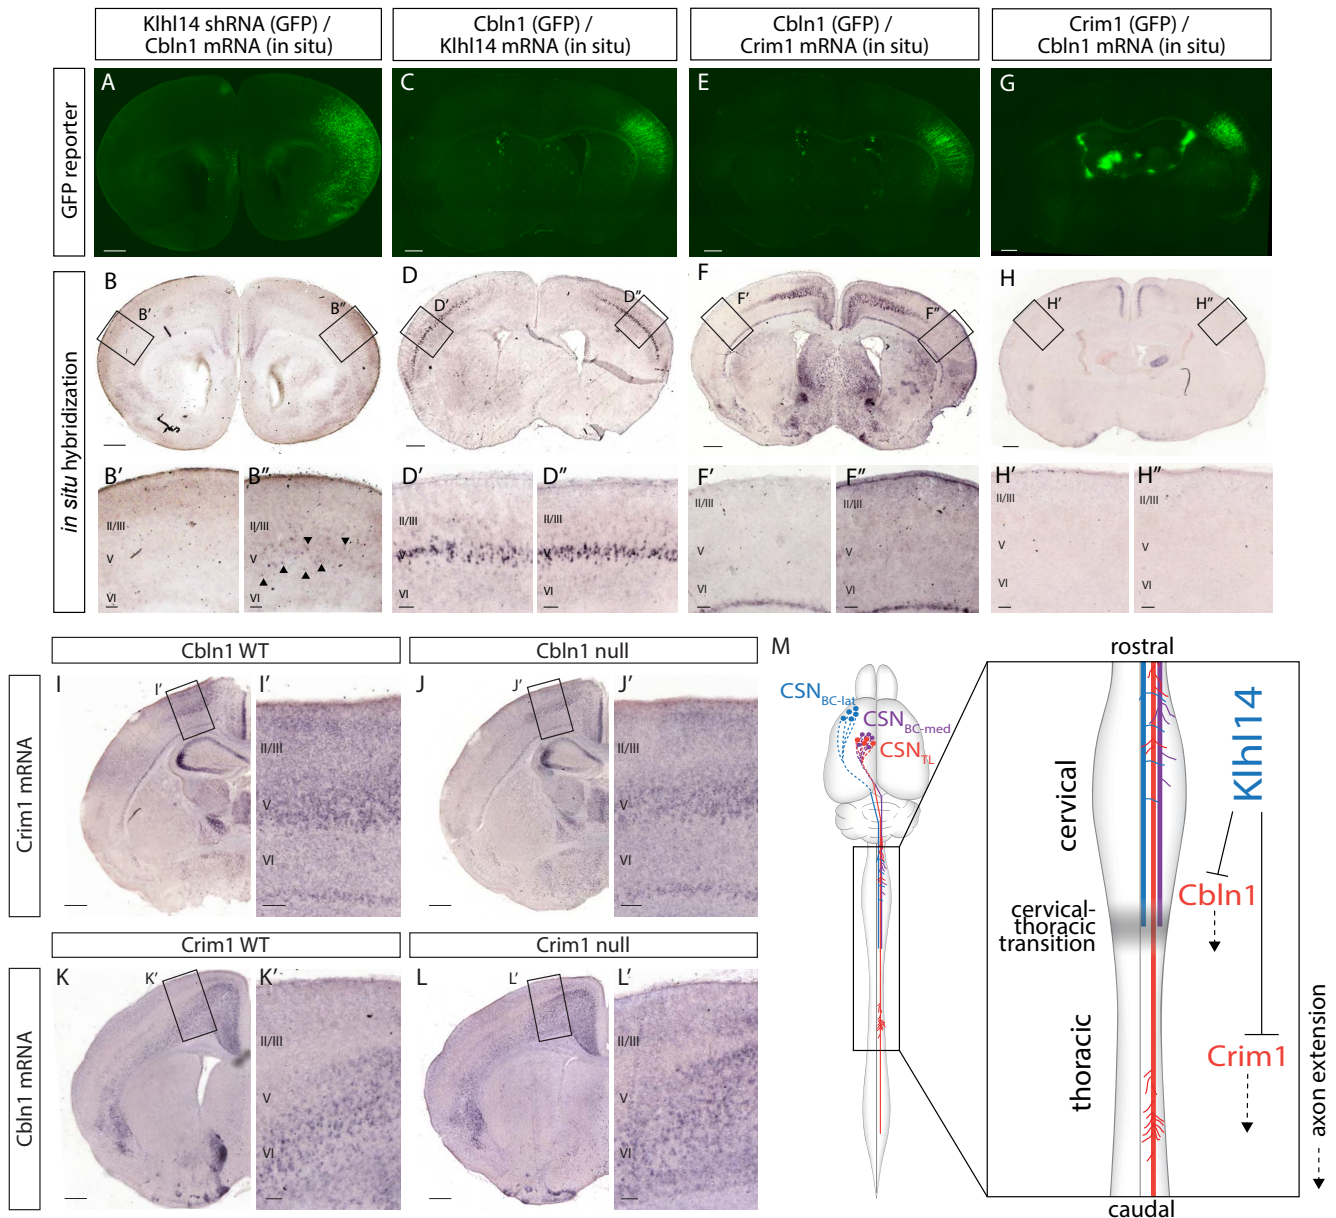

**Figure 8: *Cbln1* expression is regulated by *Khlh14* but not by *Crim1*.** (A,B) Coronal section of a P4 brain that was electroporated *in utero* at E12.5 with *Khlh14* shRNA. (A) EGFP fluorescence (green) shows the site of electroporation in lateral cortex. (B) *In situ* hybridization image of the same section in (A) shows *Cbln1* expression. *Cbln1* is normally restricted to medial cortex. However, *Khlh14* knockdown by shRNA causes ectopic *Cbln1* expression in lateral cortex (arrowheads in B'') in the electroporated cortical hemisphere (compare B'' with contralateral B'). (C,D) Coronal section of a P4 brain that was electroporated *in utero* at E12.5 with a plasmid containing *Cbln1* and *EGFP* (*Cbln1*-EGFP). (C) EGFP fluorescence (green) shows the site of electroporation in lateral cortex. (D) *In situ* hybridization image of the same section in (C) showing *Khlh14* expression in *Cbln1*-misexpressing CSN<sub>BC-lat</sub> remains unchanged, indicating that *Khlh14* expression in lateral layer V is unaffected by *Cbln1* mis-expression. (E,F) Coronal section of a P4 brain that was electroporated *in utero* at E12.5 with *Cbln1*-EGFP. (E) EGFP fluorescence (green) shows the site of electroporation in lateral cortex. (F) *In situ* hybridization image of the same section in (E) showing that there is no ectopic *Crim1* expression in *Cbln1*-misexpressing CSN<sub>BC-lat</sub>. (G,H) Coronal section of a P4 brain that was electroporated *in utero* at E12.5 with *Crim1*-EGFP. *Crim1* mis-expression in CSN<sub>BC-lat</sub> can redirect axons toward caudal thoracic spinal segments (Sahni et al., 2021b). (G) EGFP fluorescence (green) shows the site of electroporation in lateral cortex. (H) *In situ* hybridization image of the same section in (G) showing that there is no ectopic *Cbln1* expression in *Crim1*-misexpressing CSN<sub>BC-lat</sub>. (I,J) *Crim1* expression in medial layer V does not differ between *Cbln1* WT and *Cbln1* null mice. (K,L) *Cbln1* expression in medial layer V does not differ between *Crim1* WT and *Crim1* null mice. (M) Summary schematic displaying molecular controls over CSN axon extension both at, and beyond, the transition between cervical and thoracic spinal segments. Together with the previous investigations identifying *Crim1* and *Khlh14* function (Sahni et al., 2021b), our data suggest a model whereby *Cbln1* directs CSN axon extension from the cervical into the thoracic cord, whereas *Crim1* directs those CSN axons that cross this transition zone to extend further toward caudal thoracic and lumbar spinal segments. This indicates that CSN segmental axon targeting toward thoracic and lumbar segments involves multiple, distinct molecular regulators acting at distinct spinal levels. *Khlh14*, which is specifically expressed in CSN<sub>BC-lat</sub> and restricts CSN<sub>BC-lat</sub> axon extension to the bulbar-cervical segments, represses the expression of both *Cbln1* and *Crim1* in CSN<sub>BC-lat</sub>. This indicates that *Khlh14* represses a broad program of thoraco-lumbar directed axon extension in CSN<sub>BC-lat</sub>. This program, mediated by multiple independent molecular controls, would otherwise direct CSN axons past the cervical cord toward caudal thoracic and lumbar segments. Scale bars are 100 $\mu$ m for insets and 500 $\mu$ m for all other images.

and synapse maintenance in a number of other brain regions, including the hippocampus, striatum, and the ventral tegmental area of the midbrain (Kusnoor et al., 2010; Krishnan et al., 2017; Seigneur and Südhof, 2018).

Strikingly, we find that its function in CSN is quite distinct. *Cbln1* expression by CSN is strongest during the time period of axon extension, prior to axon collateralization or synapse formation. Moreover, although *Cbln1* mis-expression in CSN<sub>BC-lat</sub> re-directs these axons to the thoracic cord, these redirected axons do not collateralize in the thoracic cord at either P4 or P14. This suggests that the function and mechanism of *Cbln1* in axon extension occurs independent of synapse formation by CSN. This function is likely directly mediated by *Cbln1* localized to CSN axons; *Cbln1* has been shown repeatedly to be localized at presynaptic terminals to directly affect synapse formation and maintenance in multiple brain regions (Matsuda et al., 2010; Otsuka et al., 2016), and is likely trafficked similarly along CSN axons to directly regulate axon extension. Our data intriguingly suggest that *Cbln1* and other classical synaptic organizers might perform currently unappreciated functions in axon extension during development.

Further work will be required to identify proteins with which *Cbln1* interacts to mediate its function in CSN axon extension. *Cbln1* interactors such as *GluRδ2* and  $\beta$ -neurexins have been identified in the cerebellum (Matsuda et al., 2010; Uemura et al., 2010; ELEGHEERT et al., 2016; Cheng et al., 2016), and there is evidence that, in the cerebral cortex, where *GluRδ2* is not expressed, *Cbln1* instead interacts with *GluRδ1* (Matsuda et al., 2010; Rong et al., 2012; Wei et al., 2012; Yasumura et al., 2012). *GRID1* and *GRID2* (which encode *GluRδ1* and *GluRδ2*, respectively), as well as neurexin family members, are expressed in the human spinal cord (GTEX Consortium, 2013). These interactors have not been implicated previously in axon extension; however, it is possible that they might also interact with *Cbln1* to promote long axon extension in this novel context.

Although *Cbln1* overexpression robustly directs long CSN axon extension, we do not observe any substantial defects of CSN<sub>TL</sub> axon extension to thoracic and lumbar spinal segments in *Cbln1* null mice, suggesting that *Cbln1* is sufficient but not necessary for CSN long axon extension. What might compensate for *Cbln1* function in CSN<sub>TL</sub> in *Cbln1* null mice? The other cerebellin family members, *Cbln2*, *Cbln3*, and *Cbln4*, are known to interact with *Cbln1* and perform compensatory or redundant functions (Bao et al., 2006; Iijima et al., 2007; Miura et al., 2009; Pang et al., 2000a; Joo et al., 2011; Rong et al., 2012; Seigneur et al., 2018; Seigneur and Südhof, 2018). For instance, *Cbln1* and *Cbln2* are normally expressed in the cerebellum. Whereas *Cbln1* null mice are ataxic and have disrupted synaptic connectivity, *Cbln2* null mice display no functional or anatomical deficits in the cerebellum. Interestingly, however, *Cbln2* over-expression in the cerebellum of *Cbln1* null mice can rescue their ataxic phenotype, suggesting partial redundancy of function (Rong et al., 2012). Although compensation by other cerebellins presents a tempting hypothesis, we find that *Cbln2*, *Cbln3*, and *Cbln4* are not normally expressed by CSN<sub>medial</sub> at the time when their axons are normally extending

to distal spinal segments. It is possible that molecular controls other than *Cbln* protein family members might compensate for loss of *Cbln1* in CSN<sub>medial</sub>. For instance, *Cbln1* and neuroigin-3 have been shown to partially compensate for each other at calyx of Held synapses (Zhang et al., 2017; Yuzaki, 2017). Future studies will be needed to elucidate molecular mechanisms that might compensate for the loss of *Cbln1* function in directing CSN axon extension.

We also investigated whether *Cbln1* might regulate or be regulated by previously identified molecular controls over CSN axon extension. We previously identified that *Klhl14*, which is specifically expressed by CSN<sub>BC-lat</sub> and limits their axon extension to the cervical cord, acts at least in part to repress *Crim1* expression by CSN<sub>BC-lat</sub>. *Crim1* mis-expression in CSN<sub>BC-lat</sub> is sufficient to re-direct their axons to distal thoracic levels (Sahni et al., 2021b). In the work presented here, we find that *Klhl14* also represses *Cbln1* expression by CSN<sub>BC-lat</sub>, suggesting that *Klhl14* acts as a broad transcriptional repressor to suppress multiple molecular controls that otherwise would direct CSN axons past the cervical cord. However, we find that *Cbln1* and *Crim1* are not in the same genetic pathway in CSN. In either *Cbln1* null or *Crim1* null mice, there is no change in the expression of the other molecular control. Likewise, when either *Cbln1* or *Crim1* is misexpressed in CSN<sub>BC-lat</sub>, the other molecular control is not ectopically expressed.

Indeed, *Cbln1* and *Crim1* perform similar, but distinct, functions in directing long CSN axon extension. Mis-expression of *Cbln1*, but not *Crim1* (Sahni et al., 2021b), in CSN<sub>BC-lat</sub> increases the number of axons that reach thoracic T1-T2. Further, although both *Cbln1* and *Crim1* mis-expression in CSN<sub>BC-lat</sub> is sufficient to re-direct those axons that reach T1-T2 to extend further into the thoracic cord, their effects on axon extension within the thoracic cord are distinct. While 100% of mice in which *Crim1* was misexpressed in CSN<sub>BC-lat</sub> had axons that reached at least halfway through the thoracic cord (Sahni et al., 2021b), this was true of only 50% of mice in which *Cbln1* was misexpressed in lateral cortex. This suggests that *Cbln1* might serve as a regulator of axon targeting at the transition between cervical and thoracic spinal segments, whereas *Crim1* primarily functions to drive axon extension distal to this transition (schematized in Fig. 8M).

Additionally, CSN<sub>BC-lat</sub> axons that aberrantly extend in the thoracic cord upon either *Cbln1* or *Crim1* mis-expression fail to collateralize in the thoracic spinal gray matter. It is likely that distinct molecular controls are required to interact with extracellular cues specific to the thoraco-lumbar spinal cord to promote axon collateralization. This is consistent with previous indications that axon extension and collateralization are distinctively regulated processes (Kalil and Dent, 2014; Itoh et al., 2021).

Interestingly and potentially relevant, motor neuron diseases (MND) such as amyotrophic lateral sclerosis (ALS) and hereditary spastic paraplegia (HSP) do not affect all CSN equally (Bruijn et al., 2004; Strong and Gordon, 2005; Salinas et al., 2008). In bulbar forms of ALS, e.g., brainstem-projecting CSN are affected, while in HSP, lumbar-projecting CSN preferentially degenerate. Although multiple proteins including SOD1 and TDP-43 have been implicated in MND (Hardiman et al.,

2017), it remains unclear why certain CSN subpopulations preferentially degenerate in distinct MND subtypes. Identification and characterization of molecular controls that govern axonal development and connectivity of specific CSN subpopulations might provide insight regarding molecular mechanisms underlying preferential vulnerability of specific CSN subpopulations to degeneration.

Finally, our results suggest that Cbln1 might be a relevant molecular control for potential application in spinal cord repair and/or regeneration, and might elucidate broader organizing principles for establishing diverse connectivity by other neocortical projection neuron subtypes. Reactivating developmental controls to regulate CSN axon extension and sprouting might offer a promising approach to re-establish with some specificity damaged connectivity following spinal cord injury. More broadly, identification of molecular controls over development of anatomically and functionally diverse CSN subpopulations might elucidate fundamental principles of evolutionary diversification within originally more homogeneous neuronal populations and circuitry, while also offering potentially novel avenues for regeneration and/or repair of diseased and/or damaged neocortical or other nervous system circuitry.

## Acknowledgements

We thank Julia Kaiser for designing the schematics first shown in Figure 1A. We thank members of the Macklis and Sahni Labs for useful discussions and comments on the manuscript. This research was supported by National Institutes of Health (NIH) R01 NS045523, the Emily and Robert Pearlstein Fund, and a grant from the Travis Roy Foundation to J.D.M., NIH (NTRAIN/NICHD K12HD093427), and grants from the Wings for Life - Spinal Cord Injury Foundation and the Craig Neilsen Foundation, as well as additional infrastructure support from the Burke Foundation to V.S.. C.R. was partially supported by a postdoctoral fellowship from the Spinal Cord Injury Trust Fund through New York State Department of Health (SCIRB C33613GG). Additional infrastructure support from NIH DP1 NS106665, NS075672, Max and Anne Wien Professor of Life Sciences fund, and support from the DEARS Foundation to J.D.M.

## Conflict of interest statement

The authors declare no competing interests.

## References

Arlotta, P., Molyneaux, B. J., Chen, J., Inoue, J., Kominami, R., and Macklis, J. D., 2005. Neuronal subtype-specific genes that control corticospinal motor neuron development *in vivo*. *Neuron*, **45**(2):207–221.

Bao, D., Pang, Z., Morgan, M. A., Parris, J., Rong, Y., Li, L., and Morgan, J. I., 2006. Cbln1 is essential for interaction-dependent secretion of Cbln3. *Molecular and Cellular Biology*, **26**(24):9327–9337.

Bareyre, F. M., Kerschensteiner, M., Misgeld, T., and Sanes, J. R., 2005. Transgenic labeling of the corticospinal tract for monitoring axonal responses to spinal cord injury. *Nature Medicine*, **11**(12):1355–1360.

Bruijn, L. I., Miller, T. M., and Cleveland, D. W., 2004. Unraveling the mechanisms involved in motor neuron degeneration in ALS. *Annual Review of Neuroscience*, **27**:723–749.

Chen, B., Schaeffert, L. R., and McConnell, S. K., 2005. Fez1 regulates the differentiation and axon targeting of layer 5 subcortical projection neurons in cerebral cortex. *Proceedings of the National Academy of Sciences*, **102**(47):17184–17189.

Chen, B., Wang, S. S., Hattox, A. M., Rayburn, H., Nelson, S. B., and McConnell, S. K., 2008. The Fez2–Ctip2 genetic pathway regulates the fate choice of subcortical projection neurons in the developing cerebral cortex. *Proceedings of the National Academy of Sciences*, **105**(32):11382–11387.

Cheng, S., Seven, A. B., Wang, J., Skiniotis, G., and Özkan, E., 2016. Conformational plasticity in the transsynaptic neuroligin-cerebellin-glutamate receptor adhesion complex. *Structure (London, England: 1993)*, **24**(12):2163–2173.

Diaz, J. L., Siththanandan, V. B., Lu, V., Gonzalez-Nava, N., Pasquina, L., MacDonald, J. L., Woodworth, M. B., Ozkan, A., Nair, R., He, Z., et al., 2020. An evolutionarily acquired microRNA shapes development of mammalian cortical projections. *Proceedings of the National Academy of Sciences*, **117**(46):29113–29122.

Elegheert, J., Kakegawa, W., Clay, J. E., Shanks, N. F., Behiels, E., Matsuda, K., Kohda, K., Miura, E., Rossmann, M., Mitakidis, N., et al., 2016. Structural basis for integration of GluD receptors within synaptic organizer complexes. *Science*, **353**(6296):295–299.

Ghai, R., Waters, P., Roumenina, L. T., Gadjeva, M., Kojouharova, M. S., Reid, K. B. M., Sim, R. B., and Kishore, U., 2007. C1q and its growing family. *Immunobiology*, **212**(4–5):253–266.

Greig, L. C., Woodworth, M. B., Greppi, C., and Macklis, J. D., 2016. Ctip1 controls acquisition of sensory area identity and establishment of sensory input fields in the developing neocortex. *Neuron*, **90**(2).

GTEX Consortium, 2013. The Genotype-Tissue Expression (GTEx) project. *Nature Genetics*, **45**(6):580–585.

Han, W., Kwan, K. Y., Shim, S., Lam, M. M. S., Shin, Y., Xu, X., Zhu, Y., Li, M., and Sestan, N., 2011. TBR1 directly represses Fez2 to control the laminar origin and development of the corticospinal tract. *Proceedings of the National Academy of Sciences*, **108**(7):3041–3046.

Hardiman, O., Al-Chalabi, A., Chio, A., Corr, E. M., Logroscino, G., Robberecht, W., Shaw, P. J., Simmons, Z., and van den Berg, L. H., 2017. Amyotrophic lateral sclerosis. *Nature Reviews Disease Primers*, **3**:17071.

Hirai, H., Pang, Z., Bao, D., Miyazaki, T., Li, L., Miura, E., Parris, J., Rong, Y., Watanabe, M., Yuzaki, M., et al., 2005. Cbln1 is essential for synaptic integrity and plasticity in the cerebellum. *Nature Neuroscience*, **8**(11):1534–1541.

Hirata, T., Suda, Y., Nakao, K., Narimatsu, M., Hirano, T., and Hibi, M., 2004. Zinc finger gene fez-like functions in the formation of subplate neurons and thalamocortical axons. *Developmental Dynamics*, **230**(3):546–556.

Ibata, K., Kono, M., Narumi, S., Motohashi, J., Kakegawa, W., Kohda, K., and Yuzaki, M., 2019. Activity-dependent secretion of synaptic organizer Cbln1 from lysosomes in granule cell axons. *Neuron*, **102**(6):1184–1198.e10.

Iijima, T., Miura, E., Matsuda, K., Kamekawa, Y., Watanabe, M., and Yuzaki, M., 2007. Characterization of a transneuronal cytokine family Cbln—regulation of secretion by heteromeric assembly. *The European Journal of Neuroscience*, **25**(4):1049–1057.

Itoh, Y., Sahni, V., Shnyder, S. J., and Macklis, J. D., 2021. Lumican regulates cervical corticospinal axon collateralization via non-autonomous crosstalk between distinct corticospinal neuron subpopulations. *bioRxiv*.

Joo, J.-Y., Lee, S.-J., Uemura, T., Yoshida, T., Yasumura, M., Watanabe, M., and Mishina, M., 2011. Differential interactions of cerebellin precursor protein (Cbln) subtypes and neuroligin variants for synapse formation of cortical neurons. *Biochemical and Biophysical Research Communications*, **406**(4):627–632.

Joshi, P. S., Molyneaux, B. J., Feng, L., Xie, X., Macklis, J. D., and Gan, L., 2008. Bhlhb5 regulates the postmitotic acquisition of area identities in layers ii–v of the developing neocortex. *Neuron*, **60**(2):258–272.

Kalil, K. and Dent, E. W., 2014. Branch management: Mechanisms of axon branching in the developing vertebrate CNS. *Nature Reviews Neuroscience*, **15**(1):7–18.

Kamiyama, T., Kameda, H., Murabe, N., Fukuda, S., Yoshioka, N., Mizukami, H., Ozawa, K., and Sakurai, M., 2015. Corticospinal tract development and spinal cord innervation differ between cervical and lumbar targets. *Journal of Neuroscience*, **35**(3):1181–1191.

- Krishnan, V., Stoppel, D. C., Nong, Y., Johnson, M. A., Nadler, M. J. S., Ozkaynak, E., Teng, B. L., Nagakura, I., Mohammad, F., Silva, M. A., *et al.*, 2017. Autism gene Ube3a and seizures impair sociability by repressing VTA Cbln1. *Nature*, **543**(7646):507–512.
- Kusnoor, S. V., Parris, J., Muly, E. C., Morgan, J. I., and Deutch, A. Y., 2010. Extracerebellar role for Cerebellin1: Modulation of dendritic spine density and synapses in striatal medium spiny neurons. *The Journal of Comparative Neurology*, **518**(13):2525–2537.
- Kwan, K. Y., Lam, M. M. S., Krsnik, Z., Kawasawa, Y. I., Lefebvre, V., and Šestan, N., 2008. SOX5 postmitotically regulates migration, post-migratory differentiation, and projections of subplate and deep-layer neocortical neurons. *Proceedings of the National Academy of Sciences*, **105**(41):16021–16026.
- Lai, T., Jabaudon, D., Molyneaux, B. J., Azim, E., Arlotta, P., Menezes, J. R. L., and Macklis, J. D., 2008. SOX5 controls the sequential generation of distinct corticofugal neuron subtypes. *Neuron*, **57**(2):232–247.
- Lodato, S., Molyneaux, B. J., Zuccaro, E., Goff, L. A., Chen, H.-H., Yuan, W., Meleski, A., Takahashi, E., Mahony, S., Rinn, J. L., *et al.*, 2014. Gene co-regulation by Fezf2 selects neurotransmitter identity and connectivity of corticospinal neurons. *Nature Neuroscience*, **17**(8):1046–1054.
- Matsuda, K., Miura, E., Miyazaki, T., Kakegawa, W., Emi, K., Narumi, S., Fukazawa, Y., Ito-Ishida, A., Kondo, T., Shigemoto, R., *et al.*, 2010. Cbln1 is a ligand for an orphan glutamate receptor delta2, a bidirectional synapse organizer. *Science*, **328**(5976):363–368.
- McKenna, W. L., Betancourt, J., Larkin, K. A., Abrams, B., Guo, C., Rubenstein, J. L. R., and Chen, B., 2011. Tbr1 and Fezf2 regulate alternate corticofugal neuronal identities during neocortical development. *Journal of Neuroscience*, **31**(2):549–564.
- Miura, E., Iijima, T., Yuzaki, M., and Watanabe, M., 2006. Distinct expression of Cbln family mRNAs in developing and adult mouse brains. *The European Journal of Neuroscience*, **24**(3):750–760.
- Miura, E., Matsuda, K., Morgan, J. I., Yuzaki, M., and Watanabe, M., 2009. Cbln1 accumulates and colocalizes with Cbln3 and GluRdelta2 at parallel fiber-Purkinje cell synapses in the mouse cerebellum. *The European Journal of Neuroscience*, **29**(4):693–706.
- Molyneaux, B. J., Arlotta, P., Hirata, T., Hibi, M., and Macklis, J. D., 2005. Fezl is required for the birth and specification of corticospinal motor neurons. *Neuron*, **47**(6):817–831.
- Muralidharan, B., Khatri, Z., Maheshwari, U., Gupta, R., Roy, B., Pradhan, S. J., Karmodiya, K., Padmanabhan, H., Shetty, A. S., Balaji, C., *et al.*, 2017. LHX2 interacts with the NuRD complex and regulates cortical neuron subtype determinants Fezf2 and Sox11. *Journal of Neuroscience*, **37**(1):194–203.
- Otsuka, S., Konno, K., Abe, M., Motohashi, J., Kohda, K., Sakimura, K., Watanabe, M., and Yuzaki, M., 2016. Roles of Cbln1 in non-motor functions of mice. *Journal of Neuroscience*, **36**(46):11801–11816.
- Pang, Z., Zuo, J., and Morgan, J. I., 2000a. Cbln3, a novel member of the precerebellin family that binds specifically to Cbln1. *Journal of Neuroscience*, **20**(17):6333–6339.
- Pang, Z., Zuo, J., and Morgan, J. I., 2000b. IGF-I specifically enhances axon outgrowth of corticospinal motor neurons. *Journal of Neuroscience*, **9**(17):6333–6339.
- Rong, Y., Wei, P., Parris, J., Guo, H., Pattarini, R., Correia, K., Li, L., Kusnoor, S. V., Deutch, A. Y., and Morgan, J. I., *et al.*, 2012. Comparison of Cbln1 and Cbln2 functions using transgenic and knockout mice. *Journal of Neurochemistry*, **120**(4):528–540.
- Sahni, V., Shnyder, S. J., Jabaudon, D., Song, J. H. T., Itoh, Y., Greig, L. C., and Macklis, J. D., 2021a. Corticospinal neuron subpopulation-specific developmental genes prospectively indicate mature segmentally specific axon projection targeting. *Cell Reports*, **37**(3):109843.
- Sahni, V., Itoh, Y., Shnyder, S. J., and Macklis, J. D., 2021b. Crim1 and Kelch-like 14 exert complementary dual-directional developmental control over segmentally specific corticospinal axon projection targeting. *Cell Reports*, **37**(3):109842.
- Sahni, V., Engmann, A., Ozkan, A., and Macklis, J. D., 2020. *Motor cortex connections*. Elsevier, 2nd edition.
- Salinas, S., Proukakis, C., Crosby, A., and Warner, T. T., 2008. Hereditary spastic paraplegia: Clinical features and pathogenetic mechanisms. *The Lancet Neurology*, **7**(12):1127–1138.
- Seigneur, E., Polepalli, J. S., and Südhof, T. C., 2018. Cbln2 and Cbln4 are expressed in distinct medial habenula-interpeduncular projections and contribute to different behavioral outputs. *Proceedings of the National Academy of Sciences*, **115**(43):E10235–E10244.
- Seigneur, E. and Südhof, T. C., 2017. Cerebellins are differentially expressed in selective subsets of neurons throughout the brain. *The Journal of Comparative Neurology*, **525**(15):3286–3311.
- Seigneur, E. and Südhof, T. C., 2018. Genetic ablation of all Cerebellins reveals synapse organizer functions in multiple regions throughout the brain. *Journal of Neuroscience*, **38**(20):4774–4790.
- Shim, S., Kwan, K. Y., Li, M., Lefebvre, V., and Šestan, N., 2012. Cis-regulatory control of corticospinal system development and evolution. *Nature*, **486**(7401):74–79.
- Stevens, B., Allen, N. J., Vazquez, L. E., Howell, G. R., Christopherson, K. S., Nouri, N., Micheva, K. D., Mehalow, A. K., Huberman, A. D., Stafford, B., *et al.*, 2007. The classical complement cascade mediates CNS synapse elimination. *Cell*, **131**(6):1164–1178.
- Strong, M. J. and Gordon, P. H., 2005. Primary lateral sclerosis, hereditary spastic paraplegia and amyotrophic lateral sclerosis: Discrete entities or spectrum? *Amyotrophic Lateral Sclerosis and Other Motor Neuron Disorders*, **6**(1):8–16.
- Takeo, Y. H., Shuster, S. A., Jiang, L., Hu, M. C., Luginbuhl, D. J., Rüllicke, T., Contreras, X., Hippenmeyer, S., Wagner, M. J., Ganguli, S., *et al.*, 2021. GluD2- and Cbln1-mediated competitive interactions shape the dendritic arbors of cerebellar purkinje cells. *Neuron*, **109**(4):629–644.e8.
- Tomassy, G. S., Leonibus, E. D., Jabaudon, D., Lodato, S., Alfano, C., Mele, A., Macklis, J. D., and Studer, M., 2010. Area-specific temporal control of corticospinal motor neuron differentiation by COUP-TFI. *Proceedings of the National Academy of Sciences*, **107**(8):3576–3581.
- Uemura, T., Lee, S.-J., Yasumura, M., Takeuchi, T., Yoshida, T., Ra, M., Taguchi, R., Sakimura, K., and Mishina, M., 2010. Trans-synaptic interaction of GluRdelta2 and Neurexin through Cbln1 mediates synapse formation in the cerebellum. *Cell*, **141**(6):1068–1079.
- Wei, P., Pattarini, R., Rong, Y., Guo, H., Bansal, P. K., Kusnoor, S. V., Deutch, A. Y., Parris, J., and Morgan, J. I., 2012. The Cbln family of proteins interact with multiple signaling pathways. *Journal of Neurochemistry*, **121**(5):717–729.
- Yasumura, M., Yoshida, T., Lee, S.-J., Uemura, T., Joo, J.-Y., and Mishina, M., 2012. Glutamate receptor  $\delta 1$  induces preferentially inhibitory presynaptic differentiation of cortical neurons by interacting with neurexins through cerebellin precursor protein subtypes. *Journal of Neurochemistry*, **121**(5):705–716.
- Yuzaki, M., 2011. Cbln1 and its family proteins in synapse formation and maintenance. *Current Opinion in Neurobiology*, **21**(2):215–220.
- Yuzaki, M., 2017. The C1q complement family of synaptic organizers: Not just complementary. *Current Opinion in Neurobiology*, **45**:9–15.
- Zhang, B., Seigneur, E., Wei, P., Gokce, O., Morgan, J., and Südhof, T. C., 2017. Developmental plasticity shapes synaptic phenotypes of autism-associated neuroligin-3 mutations in the calyx of Held. *Molecular Psychiatry*, **22**(10):1483–1491.
